# Supplementary material for: Linking species habitat and past palaeoclimatic events to evolution of the teleost innate immune system
Source: PubMed Central journal article supplement (PMC5413918; doi:10.1098/rspb.2016.2810), 2017-04-26
Supplement: rspb20162810supp1.pdf [file rspb20162810supp1.pdf]

Supplementary information for manuscript:

## **Linking species habitat and past paleoclimatic events to evolution of the teleost innate immune system**

Monica Hongrø Solbakken<sup>1\*</sup>, Kjetil Lysne Voje<sup>1</sup>, Kjetill Sigurd Jakobsen<sup>1</sup>, Sissel Jentoft<sup>1,2\*</sup>

Journal: Proceedings of the Royal Society B

Main manuscript: 10.1098/rspb.2016.2810

### **Contents**

|                                                                                                                                                   |    |
|---------------------------------------------------------------------------------------------------------------------------------------------------|----|
| Linking species habitat and past paleoclimatic events to evolution of the teleost innate immune system .....                                      | 1  |
| Supplementary table 1 Overview of <i>TLR</i> copy number and northern and southern latitude boundaries collected from Fishbase. ....              | 4  |
| Supplementary table 2 All query TIR domain sequences used for teleost <i>TLR</i> characterization derived from Ensembl.org v83. and GenBank. .... | 10 |
| SLOUCH results.....                                                                                                                               | 21 |
| BEST ESTIMATES & MODEL FIT – TLR8 phylogeny .....                                                                                                 | 21 |
| BEST ESTIMATES & MODEL FIT – TLR8 group 0.....                                                                                                    | 22 |
| BEST ESTIMATES & MODEL FIT – TLR8 group 25.....                                                                                                   | 23 |
| BEST ESTIMATES & MODEL FIT – TLR8 group 50.....                                                                                                   | 24 |
| BEST ESTIMATES & MODEL FIT – TLR8 group 75.....                                                                                                   | 25 |
| BEST ESTIMATES & MODEL FIT – TLR8 group minus 25.....                                                                                             | 26 |
| BEST ESTIMATES & MODEL FIT – TLR8 group minus 50.....                                                                                             | 27 |
| BEST ESTIMATES & MODEL FIT – TLR8 MHCII .....                                                                                                     | 28 |
| BEST ESTIMATES & MODEL FIT – TLR8 group 0 + MHCII.....                                                                                            | 29 |
| BEST ESTIMATES & MODEL FIT – TLR8 group 25 + MHCII.....                                                                                           | 30 |
| BEST ESTIMATES & MODEL FIT – TLR8 group 50 + MHCII.....                                                                                           | 31 |
| BEST ESTIMATES & MODEL FIT – TLR8 group 75 + MHCII.....                                                                                           | 32 |
| BEST ESTIMATES & MODEL FIT - TLR8 group minus 50 + MHCII.....                                                                                     | 33 |
| BEST ESTIMATES & MODEL FIT – TLR8 group minus 25 + MHCII .....                                                                                    | 34 |
| BEST ESTIMATES & MODEL FIT – TLR9 phylogeny .....                                                                                                 | 35 |
| BEST ESTIMATES & MODEL FIT – TLR9 group 0.....                                                                                                    | 36 |

|                                                                 |    |
|-----------------------------------------------------------------|----|
| BEST ESTIMATES & MODEL FIT – TLR9 group 25.....                 | 37 |
| BEST ESTIMATES & MODEL FIT – TLR9 group 50.....                 | 38 |
| BEST ESTIMATES & MODEL FIT – TLR9 group 75.....                 | 39 |
| BEST ESTIMATES & MODEL FIT – TLR9 group minus 25.....           | 40 |
| BEST ESTIMATES & MODEL FIT – TLR9 group minus 50.....           | 41 |
| BEST ESTIMATES & MODEL FIT – TLR9 + MHC .....                   | 42 |
| BEST ESTIMATES & MODEL FIT – TLR9 group 0 + MHCII.....          | 43 |
| BEST ESTIMATES & MODEL FIT – TLR9 group 25 + MHCII.....         | 44 |
| BEST ESTIMATES & MODEL FIT – TLR9 group 50 + MHCII.....         | 45 |
| BEST ESTIMATES & MODEL FIT – TLR9 group 75 + MHCII.....         | 46 |
| BEST ESTIMATES & MODEL FIT – TLR9 group minus 25 + MHCII .....  | 47 |
| BEST ESTIMATES & MODEL FIT – TLR9 group minus 50 + MHCII .....  | 48 |
| BEST ESTIMATES & MODEL FIT – TLR22 phylogeny .....              | 49 |
| BEST ESTIMATES & MODEL FIT – TLR22 group 0.....                 | 50 |
| BEST ESTIMATES & MODEL FIT – TLR22 group 25.....                | 51 |
| BEST ESTIMATES & MODEL FIT – TLR22 group 50.....                | 52 |
| BEST ESTIMATES & MODEL FIT – TLR22 group 75.....                | 53 |
| BEST ESTIMATES & MODEL FIT – TLR22 group minus 25.....          | 54 |
| BEST ESTIMATES & MODEL FIT – TLR22 group minus 50.....          | 55 |
| BEST ESTIMATES & MODEL FIT – TLR22 + MHCII .....                | 56 |
| BEST ESTIMATES & MODEL FIT – TLR22 group 0 + MHCII.....         | 57 |
| BEST ESTIMATES & MODEL FIT – TLR22 group 25 + MHCII.....        | 58 |
| BEST ESTIMATES & MODEL FIT – TLR22 group 50 + MHCII.....        | 59 |
| BEST ESTIMATES & MODEL FIT – TLR22 group 75 + MHCII.....        | 60 |
| BEST ESTIMATES & MODEL FIT – TLR22 group minus 25 + MHCII ..... | 61 |
| BEST ESTIMATES & MODEL FIT – TLR22 group minus 50 + MHCII ..... | 62 |
| BEST ESTIMATES & MODEL FIT – TLR25 phylogeny .....              | 63 |
| BEST ESTIMATES & MODEL FIT – TLR25 group 0.....                 | 64 |
| BEST ESTIMATES & MODEL FIT – TLR25 group 25.....                | 65 |
| BEST ESTIMATES & MODEL FIT – TLR25 group 50.....                | 66 |
| BEST ESTIMATES & MODEL FIT – TLR25 group 75.....                | 67 |
| BEST ESTIMATES & MODEL FIT – TLR25 group minus 25.....          | 68 |
| BEST ESTIMATES & MODEL FIT – TLR25 group minus 50.....          | 69 |
| BEST ESTIMATES & MODEL FIT – TLR25 + MHCII .....                | 70 |

|                                                                                                                   |    |
|-------------------------------------------------------------------------------------------------------------------|----|
| BEST ESTIMATES & MODEL FIT – TLR25 group 0 + MHCII.....                                                           | 71 |
| BEST ESTIMATES & MODEL FIT – TLR25 group 25 + MHCII.....                                                          | 72 |
| BEST ESTIMATES & MODEL FIT – TLR25 group 50 + MHCII.....                                                          | 73 |
| BEST ESTIMATES & MODEL FIT – TLR25 group 75 + MHCII.....                                                          | 74 |
| BEST ESTIMATES & MODEL FIT – TLR25 group minus 25 + MHCII.....                                                    | 75 |
| BEST ESTIMATES & MODEL FIT – TLR25 group minus 50 + MHCII.....                                                    | 76 |
| BEST ESTIMATES & MODEL FIT – TLR9 phylogenetic effect.....                                                        | 77 |
| BEST ESTIMATES & MODEL FIT – TLR9 maximum depth.....                                                              | 78 |
| BEST ESTIMATES & MODEL FIT – TLR22 phylogenetic effect.....                                                       | 80 |
| BEST ESTIMATES & MODEL FIT – TLR22 maximum depth.....                                                             | 81 |
| Supplementary table 3 Diversifying selection analyses - results from MEME (mixed effects model of evolution)..... | 83 |
| Supplementary figure 1.....                                                                                       | 86 |
| Supplementary figure 2.....                                                                                       | 87 |

**Supplementary table 1 Overview of *TLR* copy number and northern and southern latitude boundaries collected from Fishbase.**

| Latin Name                      | TLR 1/6 | TLR 2 | TLR 3 | TLR 4 | TLR 5 | TLR 7 | TLR 8 | TLR 9 | TLR 14 | TLR 21 | TLR 21_beta | TLR 22 | TLR 23 | TLR 25 | TLR 26 | North. | South. | Average |
|---------------------------------|---------|-------|-------|-------|-------|-------|-------|-------|--------|--------|-------------|--------|--------|--------|--------|--------|--------|---------|
| <i>Arctogadus glacilis</i>      | 0       | 0     | 1     | 0     | 0     | 1     | 3     | 7     | 1      | 2      | 0           | 22     | 1      | 4      | 0      | 87     | 69     | 78      |
| <i>Boreogadus saida</i>         | 0       | 0     | 1     | 0     | 0     | 1     | 1     | 6     | 1      | 1      | 0           | 16     | 1      | 10     | 0      | 87     | 52     | 69.5    |
| <i>Trisopterus minutus</i>      | 0       | 0     | 1     | 0     | 0     | 2     | 1     | 8     | 1      | 2      | 0           | 6      | 3      | 1      | 0      | 66     | 28     | 47      |
| <i>Pollachius virens</i>        | 0       | 0     | 1     | 0     | 0     | 3     | 5     | 5     | 1      | 1      | 0           | 15     | 3      | 7      | 0      | 77     | 33     | 55      |
| <i>Melanogrammus aeglefinus</i> | 0       | 0     | 1     | 0     | 0     | 1     | 12    | 5     | 1      | 3      | 0           | 6      | 2      | 4      | 0      | 79     | 35     | 57      |
| <i>Merlangius merlangus</i>     | 0       | 0     | 1     | 0     | 0     | 2     | 7     | 6     | 1      | 1      | 0           | 11     | 1      | 2      | 0      | 72     | 35     | 53.5    |
| <i>Theragra chalcogramma</i>    | 0       | 0     | 1     | 0     | 0     | 3     | 7     | 5     | 1      | 1      | 0           | 27     | 1      | 4      | 0      | 68     | 34     | 51      |
| <i>Gadiculus argenteus</i>      | 0       | 0     | 1     | 0     | 0     | 1     | 9     | 10    | 1      | 2      | 0           | 7      | 2      | 5      | 0      | 74     | 24     | 49      |
| <i>Phycis phycis</i>            | 1       | 1     | 1     | 0     | 0     | 1     | 1     | 5     | 1      | 2      | 0           | 8      | 2      | 1      | 0      | 45     | 13     | 29      |
| <i>Molva molva</i>              | 1       | 1     | 1     | 0     | 0     | 3     | 1     | 5     | 1      | 2      | 0           | 10     | 3      | 1      | 0      | 75     | 35     | 55      |
| <i>Lota lota</i>                | 1       | 1     | 1     | 0     | 0     | 1     | 1     | 5     | 1      | 2      | 0           | 5      | 3      | 3      | 0      | 78     | 40     | 59      |
| <i>Brosme brosme</i>            | 1       | 1     | 1     | 0     | 0     | 1     | 1     | 11    | 1      | 2      | 0           | 9      | 4      | 1      | 0      | 83     | 37     | 60      |

|                                    |   |   |   |   |   |   |   |   |   |   |   |    |   |   |   |     |     |      |
|------------------------------------|---|---|---|---|---|---|---|---|---|---|---|----|---|---|---|-----|-----|------|
| <i>Merluccius merluccius</i>       | 1 | 1 | 1 | 0 | 0 | 2 | 1 | 4 | 1 | 2 | 0 | 4  | 5 | 1 | 0 | 76  | 18  | 47   |
| <i>Merluccius capensis</i>         | 1 | 1 | 1 | 0 | 0 | 1 | 4 | 5 | 1 | 2 | 0 | 6  | 4 | 2 | 0 | -11 | -37 | -24  |
| <i>Merluccius polli</i>            | 1 | 1 | 1 | 0 | 0 | 1 | 1 | 3 | 1 | 2 | 0 | 5  | 6 | 1 | 0 | 29  | -19 | 5    |
| <i>Melanonus zugmayeri</i>         | 1 | 1 | 1 | 0 | 0 | 1 | 1 | 1 | 1 | 1 | 0 | 13 | 6 | 1 | 0 | 60  | -49 | 5.5  |
| <i>Macrourus berglax</i>           | 1 | 1 | 1 | 0 | 0 | 1 | 2 | 1 | 1 | 1 | 0 | 16 | 3 | 1 | 0 | 82  | 37  | 59.5 |
| <i>Malacocephalus occidentalis</i> | 1 | 1 | 1 | 0 | 0 | 2 | 1 | 1 | 1 | 1 | 0 | 8  | 2 | 1 | 0 | 43  | -37 | 3    |
| <i>Bathygadus melanobranchus</i>   | 1 | 1 | 1 | 0 | 0 | 1 | 1 | 1 | 1 | 1 | 0 | 2  | 2 | 1 | 0 | 53  | -34 | 9.5  |
| <i>Muraenolepis marmoratus</i>     | 1 | 1 | 1 | 0 | 0 | 1 | 3 | 1 | 1 | 1 | 0 | 4  | 5 | 1 | 0 | -44 | -56 | -50  |
| <i>Bregmaceros cantori</i>         | 0 | 0 | 1 | 0 | 0 | 1 | 1 | 3 | 1 | 1 | 0 | 0  | 0 | 1 | 0 |     |     |      |
| <i>Mora moro</i>                   | 1 | 1 | 1 | 0 | 0 | 1 | 1 | 1 | 1 | 1 | 0 | 1  | 1 | 1 | 0 | 64  | -51 | 6.5  |
| <i>Laemonema laureysi</i>          | 1 | 1 | 1 | 0 | 0 | 1 | 1 | 4 | 1 | 1 | 0 | 1  | 1 | 1 | 0 | 8   | -8  | 0    |
| <i>Polymixia japonica</i>          | 1 | 1 | 1 | 1 | 0 | 1 | 1 | 1 | 1 | 1 | 1 | 2  | 2 | 1 | 0 | 40  | 6   | 23   |
| <i>Percopsis transmontana</i>      | 1 | 1 | 1 | 0 | 0 | 1 | 1 | 1 | 1 | 1 | 0 | 1  | 0 | 0 | 0 | 44  | 43  | 43.5 |
| <i>Typhlichthys subterraneus</i>   | 1 | 1 | 1 | 0 | 0 | 1 | 1 | 1 | 1 | 1 | 0 | 1  | 0 | 0 | 0 | 39  | 34  | 36.5 |

|                                 |   |   |   |   |   |   |   |   |   |   |   |   |   |   |   |     |     |      |
|---------------------------------|---|---|---|---|---|---|---|---|---|---|---|---|---|---|---|-----|-----|------|
| <i>Zeus faber</i>               | 1 | 1 | 1 | 0 | 0 | 1 | 1 | 1 | 1 | 1 | 0 | 0 | 0 | 1 | 1 | 75  | -49 | 13   |
| <i>Cyttopsis roseus</i>         | 1 | 1 | 1 | 0 | 0 | 1 | 1 | 1 | 1 | 1 | 0 | 0 | 0 | 1 | 1 |     |     |      |
| <i>Lamprogrammus exutus</i>     | 1 | 1 | 1 | 0 | 1 | 1 | 1 | 1 | 1 | 1 | 1 | 0 | 2 | 0 | 0 | 12  | -23 | -5.5 |
| <i>Brotula barbata</i>          | 1 | 1 | 1 | 0 | 1 | 1 | 1 | 1 | 1 | 1 | 1 | 0 | 2 | 1 | 0 | 30  | -14 | 8    |
| <i>Carapus acus</i>             | 1 | 1 | 1 | 0 | 1 | 1 | 1 | 1 | 1 | 1 | 1 | 1 | 1 | 0 | 0 | 42  | -15 | 13.5 |
| <i>Myripristis jacobus</i>      | 1 | 1 | 1 | 1 | 1 | 1 | 1 | 1 | 1 | 1 | 0 | 1 | 1 | 0 | 0 | 37  | -23 | 7    |
| <i>Holocentrus rufus</i>        | 1 | 1 | 1 | 1 | 1 | 1 | 1 | 1 | 1 | 1 | 1 | 1 | 3 | 0 | 0 | 33  |     | 33   |
| <i>Trachyrincus scabrus</i>     | 1 | 1 | 1 | 0 | 0 | 7 | 1 | 1 | 1 | 1 | 0 | 1 | 2 | 1 | 0 | 55  | -27 | 14   |
| <i>Chatrabus melanurus</i>      | 1 | 1 | 1 | 0 | 1 | 1 | 1 | 1 | 1 | 1 | 0 | 0 | 1 | 1 | 0 | -35 |     | -35  |
| <i>Parasudis fraserbrunneri</i> | 1 | 1 | 1 | 0 | 1 | 1 | 1 | 1 | 1 | 1 | 1 | 0 | 1 | 1 | 1 | 21  |     | 21   |
| <i>Regalecus glesne</i>         | 1 | 1 | 1 | 0 | 0 | 1 | 1 | 1 | 1 | 1 | 0 | 1 | 0 | 0 | 0 | 72  | -52 | 10   |
| <i>Lampris guttatus</i>         | 1 | 1 | 1 | 0 | 0 | 1 | 1 | 1 | 1 | 1 | 0 | 1 | 0 | 0 | 0 | 70  | -45 | 12.5 |
| <i>Guentherus altivela</i>      | 0 | 1 | 1 | 1 | 1 | 1 | 0 | 1 | 1 | 1 | 0 | 1 | 0 | 1 | 1 |     |     |      |
| <i>Antennarius striatus</i>     | 1 | 1 | 1 | 0 | 1 | 1 | 1 | 1 | 1 | 1 | 0 | 0 | 1 | 0 | 0 | 43  | -50 | -3.5 |

|                                  |   |   |   |   |   |   |   |   |   |   |   |    |    |   |   |     |     |      |
|----------------------------------|---|---|---|---|---|---|---|---|---|---|---|----|----|---|---|-----|-----|------|
| <i>Osmerus eperlanus</i>         | 1 | 1 | 1 | 0 | 1 | 1 | 1 | 1 | 1 | 1 | 1 | 0  | 0  | 1 | 1 | 70  | 43  | 56.5 |
| <i>Perca fluviatilis</i>         | 1 | 1 | 1 | 0 | 1 | 1 | 1 | 1 | 1 | 1 | 1 | 0  | 17 | 1 | 0 | 74  | 38  | 56   |
| <i>Sebastes norvegicus</i>       | 1 | 1 | 1 | 0 | 1 | 1 | 1 | 1 | 1 | 1 | 1 | 1  | 0  | 1 | 0 | 79  | 38  | 58.5 |
| <i>Chaenocephalus aceratus</i>   | 1 | 1 | 1 | 0 | 1 | 1 | 1 | 1 | 1 | 1 | 1 | 3  | 1  | 1 | 0 | -53 | -65 | -59  |
| <i>Borostomias antarcticus</i>   | 1 | 1 | 1 | 0 | 1 | 1 | 1 | 1 | 1 | 1 | 1 | 4  | 1  | 1 | 0 | 66  | -66 | 0    |
| <i>Benthoosema glaciale</i>      | 0 | 0 | 1 | 0 | 1 | 1 | 1 | 2 | 1 | 0 | 0 | 49 | 8  | 4 | 0 | 81  | 11  | 46   |
| <i>Rondeletia loricata</i>       | 1 | 1 | 1 | 1 | 1 | 1 | 1 | 1 | 1 | 1 | 0 | 2  | 3  | 1 | 1 | 67  | -42 | 12.5 |
| <i>Beryx splendens</i>           | 1 | 1 | 1 | 1 | 1 | 1 | 1 | 1 | 1 | 1 | 0 | 1  | 1  | 1 | 1 | 45  | -43 | 1    |
| <i>Neoniphon sammara</i>         | 1 | 1 | 1 | 1 | 1 | 1 | 1 | 1 | 1 | 1 | 1 | 1  | 1  | 0 | 0 | 30  | -30 | 0    |
| <i>Monocentris japonica</i>      | 1 | 1 | 1 | 1 | 1 | 1 | 1 | 1 | 1 | 1 | 1 | 1  | 1  | 1 | 0 |     |     |      |
| <i>Acanthochoaenus luetkenii</i> | 1 | 1 | 1 | 0 | 1 | 1 | 1 | 1 | 1 | 2 | 0 | 1  | 0  | 0 | 0 | 40  | -57 | -8.5 |
| <i>Stylephorus chordatus</i>     | 1 | 0 | 1 | 0 | 0 | 1 | 1 | 2 | 1 | 1 | 0 | 1  | 0  | 1 | 0 | 45  | -37 | 4    |
| <i>Spondyliosoma cantharus</i>   | 1 | 1 | 1 | 0 | 1 | 1 | 1 | 1 | 1 | 1 | 1 | 1  | 2  | 0 | 0 | 63  | -20 | 21.5 |
| <i>Thunnus albacares</i>         | 1 | 1 | 1 | 0 | 1 | 1 | 1 | 1 | 1 | 1 | 1 | 0  | 7  | 1 | 0 | 52  | -45 | 3.5  |

|                                 |   |   |   |   |   |   |   |   |   |   |   |    |    |   |   |    |     |      |
|---------------------------------|---|---|---|---|---|---|---|---|---|---|---|----|----|---|---|----|-----|------|
| <i>Helostoma temminckii</i>     | 1 | 1 | 1 | 0 | 1 | 1 | 1 | 1 | 1 | 1 | 1 | 3  | 14 | 1 | 0 | 16 | -6  | 5    |
| <i>Anabas testudineus</i>       | 1 | 1 | 1 | 0 | 1 | 1 | 1 | 1 | 1 | 1 | 1 | 2  | 3  | 0 | 0 | 28 | -10 | 9    |
| <i>Selene dorsalis</i>          | 1 | 1 | 1 | 0 | 1 | 1 | 1 | 1 | 1 | 1 | 0 | 2  | 0  | 0 | 0 | 39 | -28 | 5.5  |
| <i>Chromis chromis</i>          | 1 | 1 | 1 | 0 | 1 | 1 | 1 | 1 | 1 | 1 | 1 | 2  | 2  | 1 | 0 | 46 | -12 | 17   |
| <i>Parablennius parvicornis</i> | 1 | 1 | 1 | 0 | 1 | 1 | 1 | 1 | 1 | 1 | 0 | 1  | 1  | 1 | 0 | 36 | -6  | 15   |
| <i>Symphodus melops</i>         | 1 | 1 | 1 | 0 | 1 | 1 | 1 | 1 | 1 | 1 | 1 | 1  | 1  | 0 | 0 | 63 | 28  | 45.5 |
| <i>Pseudochromis fuscus</i>     | 1 | 1 | 1 | 0 | 0 | 1 | 1 | 1 | 1 | 1 | 1 | 1  | 1  | 1 | 0 | 26 | -24 | 1    |
| <i>Myoxocephalus scorpius</i>   | 1 | 1 | 1 | 0 | 1 | 1 | 1 | 1 | 2 | 1 | 1 | 2  | 4  | 0 | 0 | 80 | 40  | 60   |
| <i>Trachyrincus murrayi</i>     | 1 | 1 | 1 | 0 | 0 | 3 | 1 | 1 | 1 | 1 | 0 | 3  | 2  | 1 | 0 |    |     |      |
| <i>Phycis blennoides</i>        | 1 | 1 | 1 | 0 | 0 | 1 | 1 | 7 | 1 | 2 | 0 | 5  | 1  | 1 | 0 | 71 | 20  | 45.5 |
| <i>Lesueurigobius cf sanzoi</i> | 1 | 1 | 1 | 0 | 1 | 1 | 1 | 1 | 1 | 1 | 0 | 3  | 7  | 2 | 0 | 42 | -21 | 10.5 |
| <i>Gadus morhua</i>             | 0 | 0 | 1 | 0 | 0 | 4 | 8 | 5 | 1 | 1 | 0 | 12 | 1  | 6 | 0 | 83 | 35  | 59   |
| <i>Astyanax mexicanus</i>       | 1 | 1 | 1 | 0 | 1 | 1 | 2 | 1 | 1 | 1 | 0 | 0  | 3  | 0 | 1 | 36 | 24  | 30   |
| <i>Danio rerio</i>              | 1 | 1 | 1 | 3 | 2 | 1 | 2 | 1 | 1 | 1 | 0 | 0  | 0  | 0 | 4 | 33 | 8   | 20.5 |



|                               |   |   |   |   |   |   |   |   |   |   |   |   |   |   |   |    |    |      |
|-------------------------------|---|---|---|---|---|---|---|---|---|---|---|---|---|---|---|----|----|------|
| <i>Gasterosteus aculeatus</i> | 1 | 1 | 1 | 0 | 1 | 1 | 1 | 1 | 1 | 2 | 1 | 1 | 0 | 0 | 0 | 71 | 26 | 48.5 |
| <i>Oreochromis niloticus</i>  | 0 | 1 | 1 | 0 | 1 | 1 | 1 | 1 | 1 | 1 | 0 | 1 | 2 | 1 | 0 | 32 | 10 | 21   |
| <i>Oryzias latipes</i>        | 1 | 1 | 1 | 0 | 1 | 1 | 1 | 1 | 1 | 1 | 0 | 1 | 0 | 1 | 0 | 55 | 10 | 32.5 |
| <i>Poecilia formosa</i>       | 1 | 1 | 1 | 0 | 1 | 1 | 1 | 2 | 1 | 1 | 0 | 1 | 3 | 0 | 0 | 27 | 25 | 26   |
| <i>Takifugu rubripes</i>      | 1 | 1 | 1 | 0 | 1 | 1 | 1 | 1 | 1 | 1 | 0 | 1 | 1 | 0 | 0 | 46 | 21 | 33.5 |
| <i>Tetraodon nigroviridis</i> | 1 | 1 | 1 | 0 | 1 | 1 | 1 | 1 | 1 | 1 | 0 | 1 | 1 | 0 | 0 |    |    |      |
| <i>Xiphophorus maculatus</i>  | 1 | 2 | 1 | 0 | 1 | 1 | 1 | 1 | 1 | 1 | 0 | 2 | 1 | 0 | 0 | 23 | 17 | 20   |
| <i>Salmo salar</i>            | 2 | 2 | 2 | 0 | 2 | 4 | 4 | 2 | 2 | 2 | 0 | 2 | 2 | 0 | 4 | 72 | 37 | 54.5 |

**Supplementary table 2 All query TIR domain sequences used for teleost *TLR* characterization derived from Ensembl.org v83. and GenBank.**

| <b>Species</b>                                                                                          | <b>Fasta sequence</b>                                                                                                                                  |
|---------------------------------------------------------------------------------------------------------|--------------------------------------------------------------------------------------------------------------------------------------------------------|
| <i>Danio rerio</i>                                                                                      | >1_DARE_ENSDARP00000139386<br>KLTRGMSILLILLEPLPLYLIPSKYYQLKTMMSRRTYLEWPPQEGAKQKLFWANLRAALQAELPNTPDREEE                                                 |
|                                                                                                         | >14_DARE_ENSDARP00000106955<br>AIGKTFSDVILVVKPIDPSTLPSKFKLKRMLNKTLYLEWPPQPTEQNFVWQLRSVLGKPNRSIRPRTISRSRLSS<br>ARVSLIEAPQIQDPEGPDEEDHQNSPQPSNKCQLTCIEVA |
|                                                                                                         | >2_DARE_ENSDARP00000110559<br>IMDEHNDSAVLVLEPIKKTIPKRFCKLRKIMNSRTYLEWPEDEDKRDEFWSNLRAALQRDEC                                                           |
|                                                                                                         | >21_DARE_ENSDARP00000098992<br>LFQEMQDVLVLFLEPIPERQLSAYHRMRKVMLKKTLYLQWPGSNCDPNSAKELFWNLKRALRSSNSGSQDE<br>QKMDDNELRRKEKVCADKEEREYFVNQTPTEDEIYYLMP      |
|                                                                                                         | >26a_DARE_ENSDARP00000108970<br>LQVEHRDILVLFLETIPSRLLSHHRLARLVKTRTYLDWPQEPHEAFWDRLWCKLSSNAK                                                            |
|                                                                                                         | >26b_DARE_ENSDARP00000115820<br>QLEEQKHLRILIFLQHISPFELSAFHRLAKLVRSTYLDWPEEEGDREHFWDRL                                                                  |
|                                                                                                         | >3_DARE_ENSDARP00000014779<br>VMEDNRDSLILIFLEDVTDYNLNRSLHRRGMLKPKCVLYWPLHKERIPAFHQKLSALASTNKVN                                                         |
|                                                                                                         | >4_a_DARE_ENSDARP00000110093<br>FLMERNANIIIIILEDVAERKTKKILGLHKHLKKNLYLKWSRDPLSNMRFWIRLRKAIVATKQ                                                        |
|                                                                                                         | >4_b_DARE_ENSDARP00000028819<br>FLMERNANIIIIILEDVAERKTKKVFLGHKHLKKNLYLKWSRDPLSNMRFWIRLRKAILQK                                                          |
|                                                                                                         | >4aI_DARE_ENSDARP00000123702<br>FVVERNANIIIIILEDVAERKTKKVLGLHKHLKKNLYLKWSRDPLSNMRFWIRLRKAIVAT                                                          |
|                                                                                                         | >5_a_DARE_ENSDARP00000129438<br>MLVELKDILVVLVVGNIQYRLLKYEQLRSFIENRSYLWPDGQDLEWFYDQLLHKIIRNTKVKQTNIKEKDKVD<br>ENNPEAADVQADTAV                           |
|                                                                                                         | >5_b_DARE_ENSDARP00000124387<br>MQAELEDILVVLVVGNIQYRLLKYQVRSFIENRSYLWPDGQDLEWFYDQLLHKIRKDIKINQTTKEIKREEA<br>NFNTNTAV                                   |
|                                                                                                         | >7_DARE_ENSDARP00000105671<br>LMDERNVIVLIFLERMPCHSKYLRLRKRLYKKSVEWPRNPQAQRYFWSLRSLMATESQYNTLFQETL                                                      |
|                                                                                                         | >8_a_DARE_ENSDARP00000133386<br>LLEENEDVIVLLLLLEPVLQYSHFVRLRRRLCARSILEWPHSSSAEAWFWQSLRNAIRVDNQALYSELYSRYFTK                                            |
|                                                                                                         | >8_b_DARE_ENSDARP00000107821<br>LLEENEDVIVLLLLLEPVLQYSHFVRLRRRLCARSILEWPHSSSAEAWFWQSLRNAIRVDNQALYSELYSRYF                                              |
| >9_DARE_ENSDARP00000105677<br>LLDEKVDVAVLVLLDFLPKFKYLQMRKRLCKKSVLSWPRNPRVQPLFWNDLRVALVSDNVRAYNKNVTESEFF |                                                                                                                                                        |
| <i>Gasterosteus aculeatus</i>                                                                           | >6_GAAC_ENSGACP00000023718<br>RLAWGTDSVVLVLEPLPQYLIPSKYYQLKSMMGRHTYLEWPPQDRAKHRLFWANLRAALQAELPNAQVTELEE                                                |
|                                                                                                         | >14_GAAC_ENSGACP00000002280<br>AVGKTFSDVILVVKEMDPNSLPSKYLKLMKMLRTKTYLEWPPQVNNQAFWTLKGVLGKPTATQKRTHSVK<br>S                                             |
|                                                                                                         | >2_GAAC_ENSGACP00000024681<br>LFDGSAGGEAAILVLEPLSKEDVPKRFCKLRKLMSSNTYLEWPPQREEGRAEFWRRLRCAVGGGEDDPLP                                                   |
|                                                                                                         | >21_a_GAAC_ENSGACP00000012342<br>LFDEHRDVLVLFLEEISQRQVSSYHRMRKVMLKKTLYLQWPGSDCTNPTQAQELFWNLRRAMRS                                                      |
|                                                                                                         | >21_b_GAAC_ENSGACP00000011097<br>LLYDGSVDLVLVLEEIPERCLTPYTRLRKIVHKKTYLLWPETPQEQDSFWVRLIDALSVTQMVKVVFHNSVD                                              |

>22\_GAAC\_ENSGACP0000007196  
 LFDERKDVLLVLFLEDIPGAELSPYRMRKLLKRRTYLSWPRAGQHPNLFWEKLRQALGTKDDPGREELVPTLLD  
 RQ  
 >3\_GAAC\_ENSGACP00000022288  
 VIEASRDSVVLVFLQDVHDFKLSRSLFLRRGMLRSCCVLDWVPVHKERVPAFHQKLLIALGMTNRLQE  
 >5\_a\_GAAC\_ENSGACP0000005783  
 MLEELTNVILVVGKVAHYQLMRYKAVRAVQRRREYLTWPEDPQDLEWFYERLVSQILKDTKLVKVGEEPR  
 GPADEDGVQLQAIRAAAV  
 >7\_GAAC\_ENSGACP0000005259  
 LMDEKNDVIVLIFLEKLVACNSKYLRRLRKFKRSVLEWPTNPQAQLYFWFSLRSVLATESHKQYNNLFKETL  
 >8\_GAAC\_ENSGACP0000005236  
 LLDENKDVILLMLPEVLQNSHFLRLRKRMRKRSVLEWPKTPAAEPFWWTTLRNVVKVDNQAICNKTYKKYFTV  
 K  
 >9\_GAAC\_ENSGACP00000013418  
 LLDEKVDAAIIVLLEDMFPKLYELRKRKCRKSVLSWPRNPRAQPLFWNQMRMALSSDNLSYDNNMSEFI

*Takifugu rubripes*

>1\_6\_TARU\_ENSTRUP00000025134  
 HLAGSDSVLVLLEPVPQYLIPSKYYQLKFMARHTYLEWPDRAKQRLFWANLRAALQADLPHLTVTEIE  
 >14\_TARU\_ENSTRUP0000001044  
 AMGKTFSDVILVKEPIDPNSLPSKYCKLKKMLSTKTYLEWPQQVNNQQAFFWAQLRSVLRPTAVTRGRQSVRS  
 RISSASISVIGPLVDERNPEMDEDRGTEPNYEVIENSLEVSHQRQIPMAVAV  
 >2\_TARU\_ENSTRUP0000007454  
 LFDGVAGEPAILLLEPLNKDDIPRRFCKLRKLLSSTTYLEWPHGEEKVGEFWKALRTALRGEWEWEE  
 >21\_TARU\_ENSTRUP0000009725  
 LFDEHRDVLVLLLEPISERQLSSYHRMRKVMKKTLYLQWPGSECTNPPQAQGLFWSQLRRAI  
 >22\_TARU\_ENSTRUP00000015072  
 LFDEQKDVLLILFLEDIPTRQLSPFYRMRKMLKSKTYLSWPRAEGHPEVFEKLRQALLSKDMLDKPLARGISHK  
 V  
 >23\_TARU\_ENSTRUP00000010624  
 LFDEQKDVLLILFLEEIPAHQLSPYHRMRKLLKRQTYLSWTQAGRQAGVFWQNVQRALESGDAPHDQVDPLT  
 GPAEP  
 >3\_TARU\_ENSTRUP00000012195  
 VIEASRDSVVLVFLQDVHDKLSRSLFLRRGMLRSCCVLYWVPVHKERVPAFHQKLLIALGMTNRLQ  
 >5\_a\_TARU\_ENSTRUP00000011330  
 MLEELTNILVMVVGKVAHYQLMRCKAVRVFVQKRQYLTWPEDPQDLDWFYERLVSLLLKDTKEASSESSVPAS  
 LASCVF  
 >7\_TARU  
 LMDEKNDVIVLIFLENIPYNSRYLRLRRRLYRRSVLEWPTNPQARPYFWFVRSVLATESHKQYNNLFKETL  
 >8\_TARU  
 LLDENVDVIVLLEPVLQHSFLRLRRRLCGESVVDWPRATAAEPFWFQNLNRNVVRVENQVMYKNKYSKYFT  
 SK  
 >9\_TARU\_ENSTRUP00000019170  
 LLDEKVDTAVLVLLEDMFPKLYLQLRKCRKSVLSWPRNPKAQPLFWNQMRMALSSDNLSFYDNNMSEFI

*Tetraodon nigroviridis*

>1\_6\_TENI\_ENSTNIP00000017225  
 HLARSSDSVVLVLEPVPQYLIPSKYYQLKAMMARHTYLEWPDKAKQRLFWANLRAALQADLPDLTVS  
 >2\_TENI  
 LLDGAAQGRTPVLVLEPLQDGAVPQALLQAAPLLSSTTYLEWPQEQEDKVEAF  
 >21\_TENI\_ENSTNIP00000011033  
 LFDEHRDVLVLFLEAISKQLSSYHRMRKVMKKTLYLQWPDSECSIPAQAQDLFWSQLRRAIGTSSRIGTEENG  
 AGVLDSEVPEQSENHQSNENCFLLP  
 >22\_TENI\_ENSTNIP00000016626  
 LFDERKDVLLILFLEDIPISQLSPFYRMRKMLKKTLYLSWPRAEGHPLVFEKLRQALLEKETVQLR  
 >23\_TENI\_ENSTNIP00000008068  
 LFDEQKDVLLILFLEEIPAHQLSPYHRMRKLLKRQTYLSWAQAGRHRAGVFWQNVQRALECGDAPHDRVDPLM  
 GPAQP  
 >3\_TENI\_ENSTNIP00000009925

VIEASRDSVVLVFLQDVHDHRLSRTLFLRRGMLRSCCVLYWPVHKERVAAFHQKLLIALGMTNRLH  
>5\_TENI\_ENSTNIP0000008738  
MLEELTNLTVLVGKVAHYQLMRCNAVRAFVQKREYLTWPEDPQDLDFWYQKLSLLKHTKVKCAENPE  
PVAQTADRIQLQDI  
>7\_TENI\_ENSTNIP00000016967  
LMDEKNDVIVLIFLEKIPSNKYLRRLRRLYRRSVLEWPTNPQARPYFWFSLRSVLATESHKQYNNLFKETLKGCT  
VPSLLKMCNGIFVFLSQ  
>8\_TENI  
LLDENVDVILLMLLEPVLQHSFLRLRRRLCGESVLDWPRATAAEPWFQNLRLNLRVDNQVMYKNKNSKYFT  
GK  
>9\_TENI\_ENSTNIP00000018058  
LLDEKVDAAVLVLLDETFFPKVKYLQLRKRLCRKSVLSWPKNPKAQPLFWNQVRMALSSDNLFSYDNNMSESF

*Oreochromis niloticus*

>14\_ORNI\_ENSONIP00000008442  
AMGKTFSDVILVVKPIDPNSLPSKYCKLKKMLSTKTYLEWPQQVNNQQAFFWAQLRSVLGKPTTQERANSVKRR  
TLAGRISVIGPPIEERVPEEDKVTVEKDTEPKKEANKEPLNQIPLVAF  
>25\_ORNI\_ENSONIP00000017788  
AISVHRDSLVLFIPIPTNSLPKYLRLRSLRQQTYLEWPKDDRKQQTFWASLSTLHIADKSVLKDIAVAISDT  
VPLVADQM  
>2\_ORNI\_ENSONIP00000017744  
LFEGHATGEAAILILLEPLSKDDVPKRFYKLRKLMSSSTTYLEWPQEDEKREEFWRSLRNALRG  
>21\_ORNI\_ENSONIP00000025830  
LFDEHRDVLVLFLEPISERQLSSYHRMRKVMLKKTLYLQWPGSDCTNPTQAQELFWNQLRRAIKTGTRLETECS  
ATHESKEAEDFKEERSDENFYLOP  
>22\_ORNI\_ENSONIP00000008192  
LFDEQTDVILVFMEEIPSYLSPYHRMRKMLKKTLYLWPRAGEHTELFWEKLCQALETREDPEAKTLLTVPTM  
P  
>23\_a\_ORNI\_ENSONIP00000014695  
LFDEHKDVLIMVFLEDIPAKQLSPYYQMRSLVKKRSYLSWPQAVQHTGVFWQKIQQALKWKINDCIYQSVKQST  
D  
>23\_b\_ORNI\_ENSONIP00000014696  
LFDEKDVLLIFLEEIPAQQLSPYYRMRKLVKKRTYLSWPRAGQHPGVFWQNVRALETGNAPNETTLLTCSL  
PP  
>3\_ORNI\_ENSONIP00000012793  
VIEASRDSVILVFLQDVHDHKLHLSLFLRRGMLRPRCILDWPVHKERIAAFHQKLLIALGLTNRLKD  
>5\_a\_ORNI\_ENSONIP00000001683  
MLEELTNLIMLVGKPKVAHYQLMRCNAVRAFVQRKEYLTWPEDPQDMEWFYERLISDILKDSKVKLKENPK  
EPGGPEVQPESHNGINAENIKETSM  
>7\_ORNI\_ENSONIP00000025981  
LMDEKNDVIVLIFLEKIPSNKYLRRLRRLYRRSVLEWPTNPQAQPYFWFSLRSVLATEGHKQYNNLFKETL\*REQ  
YAGKCSFFSLDCFCTPLYELLYVNTLFYY  
>9\_ORNI\_ENSONIP00000015639  
LLDEKVDVAVLMDKMFPLKYLQLRKRLCRKSVLSWPHHPAQPLFWNQVRMALSSDNLKFDYDNNMSESF  
I

*Oryzias latipes*

>6\_ORLA\_ENSORLP00000005545  
GLSLGTDGIVLVLEPLPQYLIPNKYYQLKSMMLRHTYLEWPQDRAKHRLFWANLRAALQADLPNLSVTD  
>14\_ORLA\_ENSORLP00000019663  
AMGKTFSDVILVVKPIDPSSLPKYCKLKKMLSTKTYLEWPQQPNQQQFFWAQLRSVLGKPTTQDRPHSIRKR  
NSEGRISVIGPPVEKNMPKEDMPDADSKDLEFDEGNGIELSNLRQIPIMLV  
>25\_ORLA\_ENSORLP00000015994  
SISTQSDSIVFVLEPIPPDSLPRFLRLRSLKQQTYLEWPSDERKQQVFWASLKSLL  
>2\_ORLA\_ENSORLP00000003159  
LFDAGGDAAILLEPMTKDDVPKRFCKLRKLMSSSTTYLEWPGEAAQREEFWRSLRNALRGE  
>21\_ORLA\_ENSORLP00000016852  
LFDEHRDVLVLFLEPISERQLSSYHRMRKVMLKKTLYLQWPGPDTTNFLQARELFWSQLRRAIRAGNRLETEDEA  
QEHYA  
>22\_ORLA\_ENSORLP00000025294  
LFDDQKDVLLIFLEEIPNLQSPYHRMRRLKRTYLSWARAQNPQVFEKLRALQSGDDLDEGLFLVAPSM  
W

>3\_ORLA\_ENSORLP00000010275  
VIEASRDSVVLVFLQDVNDYKLSRSLFLRRGMLRPRCILEWPVQRERVPAFHQKLLIAL  
>5\_a\_ORLA\_ENSORLP00000020303  
MLEELTNILIMLVVEKMAHYQLMKCNAVRAFVRTREYLTPEDPQDLDFWYKLSLQIKDKTKVKKFALDEHEA  
GKLARAEPDGLDIGMDDIRVAGV  
>7\_ORLA  
LMDEKNDVIVLIFLEKVCNSKYLQLRKRLYRRSVLEWPANPQAQQLFWFSLRSVLATESHKQYNNLFKTEL  
>8\_ORLA  
LLDENVDVIVLLMPEVLQHSFLRLRKLRCGKSVVEWPRTAAAEWFWQNLKTVIRKDNQGMYNKTYKYFT  
NE  
>9\_ORLA\_ENSORLP00000011108  
LLDEKMDTAILVLLDETFPKLYLQLRKRLCRKSVLSWPMNPKAQPLFWNQMRVALDNLKLYDSNMSEFI

*Latimeria chalumnae*

>1\_6\_a\_LACH\_ENSLACP00000011409  
LFSENSNNLILILLEPIPYLIPDKYKLSLMAKRTYLEWPKDKNKNPLFWANLRAAIKFNLDVNNKISSCLA  
>1\_6\_b\_LACH\_ENSLACP00000017183  
TFDEKDSLILLLLEPIPTNSIPDRFCKLRKLMNKNTYLEWQPDEARQTLFWQRLKAVLDL  
>14\_LACH\_ENSLACP00000020140  
AIGQGFEDVILVVKETINPNSLPNKFCCKLRKMLSTKTYLEWPAEPNRQPFWWMQLKNVLGK  
>2\_LACH\_ENSLACP00000014305  
LFEGNDSAILILLEPIRKETIPKRFCCKLRMMNTKTYLEWQPDEGQHLFWFKLKLAIKD  
>21\_a\_LACH\_ENSLACP00000001202  
LFQEKDVLILVLFLEDIPKELSKYHRMRKVMKKTYISWPQEEDAQDLFWARIRKALKESNSNPEQDNIQLKD  
>21\_b\_LACH\_ENSLACP00000002971  
LFDEHNDVILVLFLEDIPDHVLSYRRLRKIVRKKTYLKWPSDQAGQKLFWAKLDALKSETNAHKRELSIEA  
>3\_LACH\_ENSLACP00000012956  
AIEQSHDSIILVLFLEDIPDYKLNHALCLRRGMFKSRCILSWPAQRERVNAFHQKFKVALGSSNREH  
>5\_LACH\_ENSLACP00000017461  
YFHDCKDVLIVVVGRIPQYHLMKYKPIRAFMQSRPYLRWPEELQDQDWFLEKLAYLILKKTVKRKTNNIRLQRI  
KTVT  
>13\_a\_LACH\_ENSLACP00000007185  
LLFDHSDVILILFLEHIPDYRLSSYRCLKLVKKTFIQWPEKEEEQELFWMRLKEALRPESVAPEEPKID  
>13\_b\_LACH\_ENSLACP00000014614  
LFYNNHDAVILIFLEAIPDYRLSAYQKLRKLVKKQTFISWPEDPNEKQLFWARVRNAIAQKTVNEPNLKNIAE  
>7\_a\_LACH\_ENSLACP00000001158  
LIDEKVDVIVLVFEKALQKSKYLKRLKRCSSVLDWPTNPQAQHYFWQCLKNALATDNRMQYSKLFQETL  
>7\_b\_LACH\_ENSLACP00000004758  
LIDEKLDVIVLVFEKALQKSKYLKRLKRCSSVLDWPTNPQAQRYFWQCLKNALATDNRMQYSKLFQETL  
>8\_LACH\_ENSLACP00000018907  
LMDENMDVIVLIVLEPVLQHSQYLRLRRRLCGSSILDWIPINPAERFFWQSLRNVIATDNTVRYNKMYKESIL  
>9\_LACH\_ENSLACP00000020965  
LLEEKDVVILILLDEVLKKSRYLQLRKRLCKKTVLFWPPNPFQYFWHKLRTVLDKDNHQYYDKNFVSGFD

*Lepisosteus oculatus*

>1\_6\_a\_LEOC\_ENSLOCP00000015894  
LLSQDSDNIILVLEPVPQYLIPSKFYKAMMAKRTYMEWPQDRNKHKLFWANLRAALQVNLASAGVGTDPDTE  
>1\_6\_b\_LEOC\_ENSLOCP00000021836  
VFEERRDSLILLLLEPIPANSIPDRFCKLRKMMNKSTYLEWPPDEACQSMFWKRLKAVLNLEVK  
>14\_LEOC\_ENSLOCP00000009707  
AIGKTFQDVILVVEAIDPDSLPSKYCRLKMLSTKTYLEWPEETQRRAFFWAQLCSVLGKPTLRV  
>25\_a\_LEOC\_ENSLOCP00000020879  
ALSIIQDLSLVFILLEPIPADSLPRKFLKLRALLRKQTYLEWPKVVRKQTFWASLKGML  
>25\_b\_LEOC\_ENSLOCP00000022014  
ALTIHQDLSLVFILLEPIPADSLPRRFLKLRLLRQQTYLEWPKKEKKRQFFWTNLKAMLKTANKHMMVKDVAKDI  
VDSCLLKCAE

>2\_LEOC\_ENSLOCP00000022321  
 LFDENNDTAILLLEPIPKETIPKRFCKLRKLMNSQTYLEWPEDEALQPIFVHNLKLAIKREEFNLR  
 >23\_LEOC\_ENSLOCP00000022417  
 LFDEQKDVLLVLFLEDIPACQLSPYHRMRKLVKKRRTYKWPGHREETRMFWHKLNIALQTRGEADEENPLLSGLD  
 TQD  
 >3\_LEOC\_ENSLOCP00000017046  
 VIEESRDSIVLIFLDDIPDHKLNHCLYIRRGMLNSRCILNWPLQRTRIPAFHQHLKVALGLSNRVH  
 >5\_LEOC\_ENSLOCP00000022101  
 LFTLQDVLIMVVVGGGLPQFKLMKCDPIRTFIKSRHCLHWPEDFQDIDWFYEKLAQNILKEEKSKKQTDVLLQNI  
 VQS  
 >7\_LEOC\_ENSLOCP00000012197  
 LMDEKADVILIFLEKCLQYSKYLRRLRRCRSSVLEWPSNPQAQHYFWLCLRNTMATDGHGTQYNNPFEETL  
 >8\_a\_LEOC\_ENSLOCP00000012206  
 LDDNTDVIVLVLEPVLHLSQFFRLRKRRCRKTILEWPKNPRAEKWFHWHCLRNIRVEHQAVYNKLYSCYFINK  
 >8\_b\_LEOC\_ENSLOCP00000012217  
 LDDNTDVIVLVLEPVLKHSQFFRLRKRRCRKTILEWPTNPHAEKWFHWHCLRNIRVEHQAVYNKLYSYFTSR  
 >9\_a\_LEOC\_ENSLOCP00000017493  
 LLDEKVDVVVLLDKVFKSRYLQMRKILCRKSVLTWPMNPHAHQHFVNSMKTILASDNCKYYDSNVNESFLI  
 NNLV  
 >9\_b\_LEOC\_ENSLOCP00000017758  
 LLEERADVAVFVLEKGRRSRYLQLRLLCRETVLLWPQNPQAQGYFWHRLRCVLRDQIQAASYDRKHCRGVPT  
 PL

*Anolis carolinensis*

>1\_6\_ANCA\_ENSACAP00000007179  
 LFSDEVYGLLVLLEPIPTYIIPARYHKLKALMAKRTYLEWPKEKSKHGLFWANLRAAIQTVLPNNEEMEELQG  
 >1\_6b\_ANCA\_ENSACAP00000019120  
 LFRDEVYGLLVLLEPIPTYIIPARYHKLKALMAKRTYLEWPKEKSKHGLFWANLRAAIQIKLPNNDEMEE  
 >14\_ANCA\_ENSACAP00000020761  
 AVGLGFEDVVLVKEAVDPQALPRKFKLRKLLSAKTYLEWPAEPGRQAFFWAQLAAVLGK  
 >2a\_ANCA\_ENSACAP00000019306  
 LFDENNDTAILLLEPIPAETVPRRFCKLRKLMNTKTYLEWPSDEDQKSIFWFNLKTAIKS  
 >2b\_ANCA\_ENSACAP00000017757  
 LFDENNDTAILLLEPIPEETVPRRFCKLRKLMNTKTYLEWPSDEDQKIIFWFNLNIAMKS  
 >21\_ANCA\_ENSACAP00000014787  
 LFDLKDVLVVPVLEEIPERELSAYYRMRKVMKKTYVTWPPETQAQQLFWAKLRMALAAGTTEEEEDGGRTH  
 >23\_ANCA\_ENSACAP00000018176  
 IFDQHKDVLILIFLEDIPCEYLSPHYRMRRLIKKTYLKWPEEQEIQFFWHKLNMMAMKTGEGKEEE  
 >3\_ANCA\_ENSACAP0000001660  
 AIEQSRDSIVLIFRDDIPDYKLNHALCLRRAMFKSCCILEWVPQKDHVNAFYQQLKIALQTSSRIL  
 >4\_ANCA\_ENSACAP00000013654  
 QLLDSKASLVVLEGVDAVVRQKGLFRYLRNTYLVWRDRELNRHMFLRQLKSALLEGKTWTEELKMLT  
 N  
 >5\_ANCA\_ENSACAP0000002366  
 YFCDLKDVLIMVVVAGSLSQYQLMKYQPVRAFLQRDRYLWPEEDQDVEWFLNALSHQILKEKRTQKKAQKKKV  
 PKKTGTLELKVVTIS  
 >13\_ANCA\_ENSACAP00000016366  
 IYHGHQDPLVVVFMEEISNYRLSPYHRLRKLKIQESYLTWPEEPEAEAVFWTRLREALSPGEQEQEFKPFNIVE  
 >7\_ANCA\_ENSACAP0000001544  
 LMDEKVDVILIFLEKVLQMSKCLRLRKLCSQSVLEWPTNPRSQCYPFWHCLRNLSLTANHDTSYSKLFKEMV

*Xenopus tropicalis*

>6a\_XETR\_ENSXETP00000057556  
 LFGKNSNNLILLDIPQYSIPNKYNLRSIMKHRTYLEWPKEKSKHALFWANLREAIHVNLSEKED  
 >6b\_XETR\_ENSXETP00000057561  
 LYTENNDNLILLEPIQYLYPSKYKLTLMARQTYLEWPSEKSKHGLFWANLRAAISIDLTHAESE  
 >14a\_XETR\_ENSXETP00000054703

AVGHALEDVILVVKEKVTMEDLPKRFQKLRKLLRKTYLEWPLEHTRQHFFWIQLRSILGKVSSPVIGQDDLLVDN  
GAAASWDGPASEAHHEDEI  
>14b\_XETR\_ENSXETP00000038393  
AIGHSEFEDVILVVKENVTLKDLPKRFHKLRLKMLRKTYLEWLPSEPSKQHFFWIQLKNILGSPST  
>14c\_XETR\_ENSXETP00000054700  
AIGHAFEDVILVVKKVTMEDLPKRFQKLRKMMRTKTYLEWLPSEQNRQHFFWIQLKSILGKANPP  
>14d\_XETR\_ENSXETP00000054707  
AIGHSELDIILVVKKVTMEDLPKRFHKLRLKMLRKTYLEWLPSEPSKQHFFWIQLKSIL  
>2a\_XETR\_ENSXETP00000003822  
LFDENNDAILILLEPIENETVPRKRFCKLRKLMNTKTYLEWPTDEEQQEVFWDNLKTALQS  
>2b\_XETR\_ENSXETP00000003835  
LFDENNDAILILLDPIKETVPRKRFCKLRKLMNTKTYLEWPTDEEQQEVFWDNLKTALQAPANHRP  
>21\_XETR\_ENSXETP00000059090  
LFDENRDVLLVLLDNIPDRELSTYHRMRKMLKTYITWPTPEAQQLFWAKVQEAHSVGRPSEGHQGIKIVK  
>23\_XETR\_ENSXETP00000055333  
LFEHTDVLILLFLEQIPDHHLSPYHQIRKVIKKKTYLIWPQERNATSIFWYRVSQALQTEEREDEK  
>26\_XETR\_ENSXETP00000061916  
LLAEKNDDLILVLESISGYHLSAYHRLARIVRKKTYIDWPQEENEQAEFWRRLMTVL  
>3\_XETR\_ENSXETP00000012947  
AIEQNRDSIILFLEDIPDYKLYHTIHLRRGMFKSRCILDWPDQMERIKTFYQRLKIALGSTNLVN  
>5\_XETR\_ENSXETP00000032872  
YFTELKDVLLIMVVVGSLSQYQFMKYQPIRAYVKRAQYLRWPEDIQDVEWFLGRLSYQLKENTVEKKPNQASRKP  
FNHELQNIETIS  
>13\_XETR\_ENSXETP00000009956  
AFSYKEDVLLMVLEEIPEYRLSAYHKLRLKLIKQNTYIDWPEDPRGEEVFWLKLQALDGGVCEENNIQLCD  
>7\_XETR\_ENSXETP00000011725  
LIEEKVDVILLLEKTLQRSRYLRLKRLCANSVLYWSPNPSQSYFWHCLKSAIATENQMGYDKLFDHT  
>8\_XETR\_ENSXETP00000062585  
LMDENMDVIVVLLPVLQNSQYLRRLRCKICKSSIMEWPKNPNTKSSFFWQRMKNVLLDNCNRYNNFYTDIAN  
>9\_XETR\_ENSXETP00000013094  
LLDEKDVVALVLDHMKMSQYFLTRKRLCPKSFNLWPCNPKASHFWHMLRIYIRQDSRRCCGSQKLYY

*Poecilia formosa*

>1\_6\_POFO\_ENSPFOP00000020173  
RLSQGSDSLVLLLEPLPQYLIPIKSKYQKLSMMKRHTYLEWPDQKAKHRLFWANLRAALQADLPSKLVAEETEE  
>14\_POFO\_ENSPFOP00000018414  
AMGKTFSDVILVVKPIDPSSLPKYCKLKKMLSTKTYLEWPPQVNNQPPFFWAQLRSVLGKPTMTREGTNSIRSR  
NTSERFSVVEERIEVKNPLEGNKKEIQSEIHRTEIELQDQRNLEAQ  
>2\_POFO\_ENSPFOP00000000533  
LFEAGGDTAILILLEPLSKDDVPKRFCKLRKLMSSSTTYLEWQEEERRPEFWRSLRNALRGDNEQEN  
>21\_POFO\_ENSPFOP00000020442  
LFDEHRDVLVLFLEPISERQLSSYHRMRKVMMLKTYLQWPGPDCTDPSQAQELFWNQLRRAIRAGNRLETEQN  
DPDEFARASNETGNYEKLSDDEDYLOP  
>22\_POFO\_ENSPFOP00000004631  
LFDEQKDVLLVLFLEDIPTYLLSPFHRMRKLLKQTYLSWPRAADHPEVFWENLRKALQGTGNDPNEEKLQAVIET  
Y  
>23\_a\_POFO\_ENSPFOP00000024685  
LFDEKDVLLILLEPIPSYHLAPYYRMRKLVKKRTYLSWPQAAQHPGVFWQNVQRALQAGGALTENTDPLTGP  
AGI  
>23\_b\_POFO\_ENSPFOP00000028752  
LFDEKDVLLILLEPIPSYHLAPYYRMRKLVKKRTYLSWPKAEKHPGVFWQNVQRALQKDDPPKNPALLTGPT  
QC  
>23\_c\_POFO\_ENSPFOP00000011089  
LFDEQKDVLLVLFLENIPAHHLSPYYRMRKLVKKRTYLSWPQAAQHPGVFWQNVQRALQAGGALAEENTDLLLL  
PAGR  
>3\_POFO\_ENSPFOP00000005811  
VIEASRDSVLLIFLQDVHDYKLSRSLFRRGMLHQRCVNLN/PAQKERIPAFNQKLLIALGMTNRLOE

>5\_POFO\_ENSPFOP0000000698  
MLEELTNVLMVGVGKVAHYQLMKCNAVRAFVQRREYLTWPEDQDLEWFYERLVSILRDTKVKKFAEDKPE  
TVKPDCCPPAKEKIPLNIRVNNLAGNPLM  
>7\_POFO\_ENSPFOP00000025729  
LMDEKNDVIVLIFLEKVCNSKYLRRLRKYKRSVLEWPTNPQAQPYFWFSLRSVLATESHKQYSNLFKETL  
>8\_POFO\_ENSPFOP00000027487  
LLDENVDVIVLLMLEPVLQSHFLRLRRRLCEKSVVVEWPRATAAEPWFQNLRSVVKVDNQIMYSKYKFFSS  
K  
>9\_POFO\_ENSPFOP0000000377  
LLDEKVDAAVVVLLDEMFPKLYLQLRKLCKRSVLSWPRNPRAQPLFWNQMRMALSSDNLKFDNNMSESEFI

*Astyanax mexicanus*

>1\_6\_ASME\_ENSAMXP00000026268  
RLTRGLDSIILILLEPPLYLIPSKYHHLKAMMARRTYLEWPQDKTKQRMFWANLRAVLQADLPRSSSLEAGNQE  
>14\_ASME\_ENSAMXP00000019326  
AIGKNLRDVILVKEPIDPKSLPSKYCKLKKMLNKTLYLEWPEQPKQQAFFWAQLRSVMGKPNLLKQNSVIENRR  
VSKLSRASVIELPEVKPQITAGTEELPERNTENCSLRMPLEQLA  
>2\_ASME\_ENSAMXP00000026287  
IVDEHNDSAVLILLEPIAKQTIPKRFCKLRKIMNSKTYLEWPQEEEREEFWSNLQAALKR  
>21\_ASME\_ENSAMXP00000025842  
LFHEMQDVLVLLVLESIPERKSTYHRMRKVMKTYLQWPGDCTDPAKAQGLFWKQLKALRSSSTRQEEH  
SMEADVQLGEEKDAPNTEDREYFVNQPHVDEEAYLMP  
>23\_a\_ASME\_ENSAMXP00000025763  
LFDEQKDVILVLFLEDIPTQQLSPYHQMRKLVKKTYLKWPKGEDTKVFWQKRLALETKEDLDENALL  
>23\_b\_ASME\_ENSAMXP00000026712  
LFDEKDVILVLFLEDIPNSELSPYRMRRIKRTYKWPGLKDTQYFWQKLRAALETGSSDENNSALQSAQ  
>23\_c\_ASME\_ENSAMXP00000026713  
LFDEKDVILVLFLENIPAHQLSPYRMRRIKRTYLSWPKGEDTRVFEKLRVALETGTYEESLLSGIRRT  
>26\_ASME\_ENSAMXP00000026963  
LQVEHRDILVLFLEKIPSKMLSAHRLARLVKTRTYLAWPQKAELQDEFWERM  
>5\_ASME\_ENSAMXP00000026717  
MLEEVQDILLMLLDVQIPQYRLMKYEPITYVQTKRYLCWPEDSQDLQWFYNQLQHSILKGTAKAKAIDAETA  
NNVPEVEAVTVF  
>7\_ASME\_ENSAMXP00000026765  
LLDEKNDVIVLIFLEKSSSHSKYLRLRKYKRSVLEWPRNPRAQPYFWFCLKSVMAAESQQHYNKLQFQETL  
>8\_a\_ASME\_ENSAMXP00000026319  
LLEEGVDVMVILLEPVLQHSRILHLRRLCLCGNSVLEWPRNPQAQNWFWQSLRNAIKKEKQGMQNKLFKNY  
>8\_b\_ASME\_ENSAMXP0000001765  
LLEESKDVIVLLMLEPVLQSSHFLRLRQLCSQSVLEWPRAPAAEPWFQCLRNIRVENCDMYSKIYSRYFTSRS  
SSVRD  
>9\_ASME\_ENSAMXP00000027050  
LLDEKVDVAVLVLLDSVFPKVKYLQMRKRLCKKSVLSWPKNPQAQPLFWNDLCAIASDNVKSVDKVTESFLSH  
ELL

*Gadus morhua*

>14\_GAMO\_ENSGMOP0000004019  
AMGKAFSDVILVMEPIDPHSLPSKYCKLKKMLSTKTYLEWPQPKHQPFQWAQLKSVLGGKPSLTRGRAGSTRS  
RAASEGRVSMIEPPMEVDQDQDHGVNKAELHGEEIETKELFLKPIPIAV  
>25a\_GAMO  
AIDAQQDSLVIFFLEPIPTNSLPKFKLRLRLLMQQTYLEWPKDERKQVFWVNLRSMLQVADHRILKDMALELT  
QSASLIPDDLVPPLK  
>25c\_GAMO  
ALDAQQDSLVIFFLEPIPTNSLPKFKLRLRLLMQQTYLEWPKDERKQVFWVNLRTMLQVADHRILKDMALELT  
QSASLIPDDLVPPLK  
>25d\_GAMO  
AIDAQQDSLVIFFLEPIPTNSLPKFKLRLRLLMQQTYLEWPKDERKQVFWVNLRSMLQVADHRILKDMALEL  
TQSASLIPDDLVPPLK  
>25e\_GAMO  
AIDAQQDSLVIFFLEPIPTNSLPKFKLRLRLLMQQTYLEWPKDERKQVFWVNLRSMLQVADHRILKDMALEL  
TQSASLIPDDLVPPLK



>25f\_GAMO  
AIDAQQDSLVLLEPIPTNSLPPKFLKRLKLLMQQTYLEWPKDERKQQVFWVNLRSMLQVADHRILKDMALELT  
QSASLIPHDLVPLLK

>21\_GAMO\_ENSGMOP00000019623  
LFDEHRDVLILVLEHUPERELSSYHRMRKVMLRKTYLQWPGSECTDPAMAQLLFWKQLRRALRTGSRMEDED  
AAGEKKSSGTAEGDQTD SAVNPTAEIYQ

>22a\_GAMO  
LFDEQKDVILVLFLEDIPMQQLSPYYRMRLLKRKTYLSWSRADAHPDFWEKLRQAALDTQEHPMGEHLRLTVE  
DGPTGERPDQ

>22b\_GAMO  
LFDEQKDVILVLFLEDIPMQQLSPYYRMRLLKRKTYLSWSRADAHPDFWEKLRQALETQEHPMGEHLRLTIED  
GPPGERQDQS

>22c\_GAMO  
LFDEQKDVILVLFLEDIPMQQLSPYYRMRLLKRKTYLSWSRADAHPDFWEKLRQAALDTQEHPMGEHLRLTVE  
DGPPGERPDQ

>22d\_GAMO  
LFDEQKDVILVLFLEDIPMQQLSPYYRMRLLKRQTYLSWSRADAHPDFWEKLRQALETREHPMGEHRLTVV  
NGPPGERPDH

>22e\_GAMO  
LFDEQKDVILVLFLEDIPMQQLSPYYRMRLLKRQTYLSWSRADAHPDFWEKLRQAALDTQEHPMGEHLRLTVE  
EGPPGERPDQ

>22f\_GAMO  
LFDEQKDVILVLFLEDIPMQQLSPYYRMRLLKRQTYLSWSRADAHPDFWEKLRQALETQEHPMGEHILLTV  
EDGPPGERPDQ

>22g\_GAMO  
LFDEQKDVILVLFLEDIPMQQLSPYYRMRLLKRQTYLSWSRADAHPDFWEKLRQALETQEHPMGEHILLTVED  
GPPGERPDQ

>22h\_GAMO  
LFDEQKDVILVLFLEDIPMQQLSPYYRMRLLKRQTYLSWSRADAHPDFWEKLRQALETQEHPMGEHILLTVED  
GPPGERPDQ

>22j\_GAMO  
LFDEQKDVILVLFLEDIPMQQLSPYYRMRLLKRQTYLSWSRADAHPDFWEMLRQALETREHPMGEHRLTVV  
NGPPGERPDH

>22l\_GAMO  
LFDEQKDVILVLFLEDIPMQQLSPYYRMRLLKRQTYLSWSRADAHPDFWEKLQAALDTQEHPMGEHLRLTV  
VGSPGERPDQ

>23\_GAMO  
LLDEKDVILVLFLEELPEKQLSPYYRMRKLVRRSTYLSWPQAARHPGLFWQNVHRALES GD SHDDNTHFLSGPA  
L

>3\_GAMO\_ENSGMOP00000000792  
VMEERRDAVILVFLQDINDYRLSRLFLRRGMLQLRCLLNWPVHKERIPAFHEKHLIALGTTNTPKP

>7a\_GAMO  
LMDEKDDVIVLIFLEKAASNSKYLRLKRLYRRSVLEWPTNPQAQPYFWFGLRSVLATESNKQYS DMFRET L

>7b\_GAMO  
LMDEKDDVIVLIFLEKAASNSKYLRLKRLYRRSVLEWPTNPQAQPYFWFGLRSVLATESNKQYYS DMFRET L

>8a\_GAMO  
LLDENLDVIVVLMLEPVLQNSHFLRLRRRLCGESVVEWPRTAAAEPWFQNLNRNVVVDNQMTMYTSTYSQYFT  
CSRERD

>8c\_GAMO  
LLDENLDVIVVLMLEPVLQNSHFLRLRRRLCGESVVEWPRTAAAEPWFQNLNRNVVVDNQMTMYTSTYSQYFT  
CSRERD

>8d\_GAMO  
LLDENLDVIVVLMLEPVLQNSHFLRLRRRLCGESVVEWPRTAAAEAWFQNLNRNVVRLDNQMTMYTSTYSQYFT  
CSRERD

>8e\_GAMO  
LLDENLDVIVVLMLEPVLQNSHFLRLRRRLCGESVVEWPRTAAAEPWFQNLNRNVVVDNQMTMYTSTYSQYFT  
CSRERD

>8f\_GAMO  
LLDENLDVIVVLMLEPVLQNSHFLRLRRRLCGESVLEWPRTAAAEPWFQNLNRNVVVDNQMTMYSTYSQYFT  
CSRERD

>8j\_GAMO

LLDENLDVIVVLMLEPVLQSHFLRLRRRLCGESVVEWPRTAAAEWFWQNLNRVVRVDNQMTMYTSTYSQYFT  
CSRRERD  
>8I\_GAMO  
LLDENLDVIVVLMLEPVLQNSHFLRLRRRLCGESVVEWPRTVAAEPWFWQNLNRVVRVDNQMTMYTSTYSQYFT  
CSRERD  
>9a\_GAMO  
LLDEKVDVAVLILLDKMFPKLYQLRTRLCCKSVMSWPRNPQAQPLFWNQMRALSSDNLKLYDKNISEFI  
>9b\_GAMO  
LLDEKVDVAVLILLDKMFPKLYQLRTRLCCKSVMSWPRNPQAQPLFWNQMRALSSDNLKLYDSNISEFI  
>9c\_GAMO  
LLDEKVDVAVVILLDKMFPKLYQLRTRLCCKSVMSWPRNPQAQPLFWNQIRALSSDNLQIYDNNFSEGI  
>9d\_GAMO  
LLDEKVDVAVLILLDKMFPKLYQLRTRLCCKSVMSWPRNPQAQPLFWNQMRALSSDNLKLYDNNISEGI  
>9e\_GAMO  
LLDEKVDVAVLILLDKMFPKLYQLRTRLCCKSVMSWPRNPQAQPLFWNQMRALSSDNLKLYDNNISEFI

*Xiphophorus maculatus*

>1\_6\_XIMA  
RLSQGSDSIVLVLEPLPQYLIPSKYYQLKSMNRHTYLEWPQDKAKHRLFWANLRAALQTDLPKLVSETEE  
>14\_XIMA\_ENSXMAP00000013389  
AMGKTFSVDVILVKEPIDPSSLPKYCKLKKMLSTKTYLEWPQQVNVQPPFFWAQLRSVLGKPTMTREGTNSIRSR  
NSSE  
>2\_a\_XIMA\_ENSXMAP00000008276  
LFEAGGDAAILILLEPLSKDNVPRFCKLRKLMSTTYLEWPQEEERRPEFWRSRNLALRGDND  
>2\_b\_XIMA\_ENSXMAP00000008281  
LFEAGGDAAILILLEPLSKDDVPKRFCKLRKLMSTTYLEWPQEEERRPEFWRSRNLALRGDNEQEN  
>22a\_XIMA  
LFDEQKDVILVLFLEDIPTYLLSPFHRMRQLLKKQTYLSWPRAAGHPEVFWENLRKALQTGNANEENFLSLTQE  
>22b\_XIMA  
LFDEQKDVILVLFLEDIPTYLLSPFHRMRKLLKKQTYLSWPRAAGHPEVFWENLRKALQTGNPNEEKLQTVTET  
Y  
>23\_XIMA  
LFDEKDVILVLFLEIEISAHHLSPYYRMRKMLKRTYLSWSAQHPGVFWQNVQRALQAGDAPENSMLTGPTG  
R  
>3\_XIMA\_ENSXMAP00000018909  
VIEASRDSVVLIFLQDVHDKLSRSLFRRGMLRPSVNLWPPQKERIPAFNQKLLIALGMTNRLQE  
>5\_XIMA\_ENSXMAP00000001784  
MLEELTNVLMVVGKVAHYQLMKCNAVRAFVQRREYLTWPEDQDLEWYERLVSLILRDTKVKKFVEDKPEF  
VKPDCQPPAKDKIPIENIGVVANSVDVGNVDELTFINVKEEGLYEPTKADSTHSAQVIVTSP  
>7\_XIMA\_ENSXMAP00000004436  
LMDEKNDVIVLIFLEKVCNSKYLRKRLRYKRSVLEWPTNPQAQPYFWFSLRSVLATESHKQYSSLFKETL  
>8\_XIMA\_ENSXMAP00000004435  
LLDENEDVIVVLMLEPVLQSHFLRLRRRLCEKSVVEWPRTAAAEWFWQNLRSVVKVDNQIMYSKTYKFFSSK  
>9\_XIMA\_ENSXMAP00000007651  
LLDEKVDAAVVVLLDEMFPKLYQLRKRKCRKSVLSWPRNPRAQPLFWNQMRMALSSDNLKLYDNNMSEFI

*Petromyzon marinus*

>1a\_PEMA\_ENSPMAP00000011399  
LMESRDGALVLLLEPIPRDSVPSRFRCLRRRLMARKTYLEWPVEQSKQALFWANLRATLSCQREQEPQNLIVV  
>1b\_PEMA\_ENSPMAP00000011400  
LMESRDDALVLLLEPIPRDSVPSRFRCLRRRLMGRKTYLEWPAAEQGKQVLFWANLRATLGE  
>25a\_PEMA\_ENSPMAP00000011066  
VLEQRQDSLVLLEPLPRNSVPSKFCRLRKLNRKTYLEWPAEEGKRSMFWASLRAVLQSDHEPSNPNNSHRIS  
TCNSNPIRNPYV  
>25b\_PEMA\_ENSPMAP00000011211  
MVEENQDSLVLLEPLPKGSLPSKFCRLRLLSNKTYLEWPTEERKRAVFWTSLNAVLQSRPPP  
>21a\_PEMA\_ENSPMAP00000011080

LFDEHKDVIMVFLLEDIPDYKLSAYHRMRKIIGDKTYISWPEDAAGKDLFWAKLRAAI  
>21b\_PEMA\_ENSPMAP00000011162  
LFNEHKDVLIMVLETIPSYKLSAYYRMRRIVNKNKYIVWPDNDNIGRELFWAKLRTAL  
>21c\_PEMA\_ENSPMAP00000005491  
LFSEHRDVLVTLIVEDIAADRELSAHRMHRLCTKTHVVWPRDEAARPLFWAKLRTALGEPSSAAA  
>3\_PEMA\_ENSPMAP00000001776  
AIEQNRDDVVLALLEDIPEFELHKKLCLRAAMFPRRCVLRWPQDPTRLPLFLQQLRVALGS  
>7\_8\_9a\_PEMA\_ENSPMAP00000002547  
LLDEKVDMLVLMLEMRSSFRSRYMRLRQLSPGSILRWPTNPHAQKIFWQGLRDALAGPSKAATQAAKRR  
R  
>7\_8\_9b\_PEMA\_ENSPMAP00000006887  
MIDEKKDVMVFMLEMRPSRFLYSRYMRMRKRLCPDSFLQWPPNPHAQHLFWKCLRAEITKSQTEQYWQVY  
EITV

*Gallus gallus*

>1\_GAGA  
LFSENSNSLILILLEPIPSYVIPARYHKLKALMAKRTYLEWPKERSKHALFWANLRAVNIKLPTSFETDEEQSDVTST  
SSITQCLIK  
>6\_GAGA\_ENSGALP00000028126  
LFSENSNSLILILLEPIPPYVIPARYHKLKALMAKRTYLEWPKERSKHALFWANLRAAVNIKLPTSFETDEEQSDVTS  
TSSITQCLIK  
>15\_GAGA\_ENSGALP00000013260  
VLDENQDSLIMVLEDLPPDSVPQKFSKLRKLLKRKTYLKWSPPEHKQKIFWHQLAAVLKTTNEPLVRAENGPNE  
DVIEME  
>16\_GAGA\_ENSGALP00000043467  
LFSENSNSLILILLEPIPPYVIPARYHKLKALMAKRTYLEWPKERSKHALFWANLRAAISINLSVADEQNRTEV  
>2a\_GAGA  
LFDENNDVAILILLEPIQSQAIPKRFCKLRKIMNTKTYLEWPPDEEQQMFWENLKAALKS  
>2b\_GAGA  
LFDENNDVAILILLEPIQSQAIPKRFCKLRKIMNTKTYLEWPPDEEQQMFWENLKAALKS  
>21\_GAGA\_ENSGALP00000001118  
LLDERRDILVLLLEDVGAELSAHRMRRVLLRRTYLRWPLDPAAPLFWARKLRALRWGEGGEEEEEEGLGG  
GTGRPREGDKQM  
>3\_GAGA\_ENSGALP00000021914  
AIEQSRDSIILIFLHNIQDYKLNHALCLRRGMFRSCCINWPVQKERINAFHQQLMMALKSNSK  
>4\_GAGA\_ENSGALP00000011319  
QLVEGKAGIIMILGEVDKTLRLQRLGSLRYLRRNTYLEWKNKEISRHFWRQLTSVLLGKKNWHEEIKLM  
>5\_GAGA\_ENSGALP00000015286  
YFSDLKEVLIMVVVGSLSQYQLMKHKPIRIFLQRSRYLRWPEDYQDIGWFLDNLSSQILKEKVKQRNVSGIELQTIA  
TVSH  
>7\_GAGA\_ENSGALP00000026726  
LLDEKIDVILIFLEKVLQSRVYQLRKRCLRSSVLEWPTNPRSQPYFWQRLKNAIAMNNTLSYNKLLQETV

*Homo sapiens*

>1\_HOSA\_ENSP00000354932  
LFHEGSNSLILILLEPIQYSPSSYHKLKSLMARRTYLEWPKESKRGLFWANLRAAINIKLTEQAKK  
>6\_HOSA\_ENSP00000480266  
LFHEGSNNLILILLEPIQNSIPNKYHKLKALMTQRTYLRWPKESKRGLFWANLRAAFNMKLTVTENNDVKSS  
>10\_HOSA\_ENSP00000478985  
LFHENS DHIIILILLEPIFYCIPTRYHKLKALLEKAYLEWPKDRRKCGLFWANLRAAINVNLATREMYELQTFTEL  
NEESRGSTISLMRTDCL  
>2\_HOSA\_ENSP00000260010  
LFDENNDAAIILILLEIEKKAIPQRFCCKLRKIMNTKTYLEWPMDEAQRGFWVNLRRAIKS  
>3\_HOSA\_ENSP00000423684  
AIEQNLDSIILVFLIEIPDYKLNHALCLRRGMFKSHCILNWPVQKERIGAFRHKLQVALGSKNSVH  
>4\_HOSA\_ENSP00000377997  
QFLSSRAGIIFIVLQKVEKTLRQVVELYRLLSRNTYLEWEDSVLGRHIFWRRLRALLDGGKSWNPEGTVGTGCN  
WQEATSI  
>5\_HOSA\_ENSP00000440643

CLSDLNSALIMVVVGSLSQYQLMKHQSIIRGFVQKQYLRWPEDLQDVGVFLHKLSSQQLKKEKEKKDNNIPLQ  
TVATIS

>7\_HOSA\_ENSP00000370034

LMDEKVDVILIIFLEKPFQKSKFLQLRKLRCGSSVLEWPTNPQAHPYFWQCLKNALATDNHVAYSQVFKETV

>8\_HOSA\_ENSP00000312082

LMDENMDVIFILFLEPVLQHSQYLRLRQRICKSSILQWPDNPKAEGFLWQTLRNVVLTENDSRYNMIVDSIKQY

>9\_HOSA\_ENSP00000353874

LLEDKDVVVLVILSPDGRRSRYVRLRQLCRQSVLLWPHQPSGQRSFWAQLGMALTRDNHFFYNRNFQCGPT  
AE

*Mus musculus*

>11\_MUMU\_ENSMUSP00000068906

LVARPGTTHLLLFLLEPLDRQRLHSYHRLSRWLQKEDYFDLSQGKVEWNSFCEQLKRRLSKAGQERD

>12\_MUMU\_ENSMUSP00000074381

LLAAPSPPVLLLFLFLEPISRHLQPGYHRLARLLRRGDYCLWPEEEERKSGFWTWLRSLRG

>13\_MUMU\_ENSMUSP00000043101

MFYEHKDVILIIFLEEIIPNYKLSYHRLRKLINKQTFITWPDVSHQQPLFWARIRNALGKETVEKENTHLLIVVE

*Rattus norvegicus*

>11\_RANO\_ENSRNOP00000051449

LIARPGTTCLLLLFLEPLDRQKLHSYHRLSRWLQKEDYFDLSQGKMEWNTFCEQLKQRLRARKERED

>12\_RANO\_ENSRNOP00000062596

LLAAPSPPVLLLFLFLEPISRHLQPSYHRLARLLRRGDYCLWPEEEERKGGFWTWLRSLRG

*Ictalurus punctatus*

>25\_ICPU\_AEI59680.1

AISVRDSDLVILFLEPIPSDSLPPKFLRLSTMLRQKTYLEWPKDXTKKKVFWSLSILQTADKRMVLKEIACDIAEN  
TLLNAQQ

>26\_ICPU\_AEI59681.1

LLVENRDVLIVVLEKISPRQLSAHRLARVVKKTYIDWPEEPGRRTAFWDRLWAKLAPEPARTQR

>21\_ICPU\_AEI59678.1

LFDEMQDVLLLFLFLEDIHERQLSAYHRMRKFMKKTYLQWPGLDCTDPIKAQELFWTQLKRALRSSNSRSQDEE  
QTLNVQNGPQIDARVEEREYFMNQGGMDDGPPYLTP

## SLOUCH results

### BEST ESTIMATES & MODEL FIT - TLR8 phylogeny

#### MODEL PARAMETERS

|                                | Estimate   |
|--------------------------------|------------|
| Rate of adaptation             | 11.7482573 |
| Phylogenetic half-life         | 0.0590000  |
| Phylogenetic correction factor | 0.9148817  |
| Stationary variance            | 4.1000000  |

#### PRIMARY OPTIMA

|              | Estimate | Std.error |
|--------------|----------|-----------|
| Theta_global | 1.454513 | 0.2747245 |

#### MODEL FIT

|           | Value      |
|-----------|------------|
| Support   | -129.99582 |
| AIC       | 265.99165  |
| AICc      | 266.40544  |
| SIC       | 272.37305  |
| r squared | 0.00000    |
| SST       | 61.78786   |
| SSE       | 61.78786   |

```
> model.fit(ancestor, indata3$time, seq(0.00,0.1, 0.001), seq(1, 10, 0.1), response= indata3$TLR8,  
me.response= NULL, fixed.fact=NULL, fixed.cov= NULL, me.fixed.cov= NULL, mecov.fixed.cov=NULL,  
random.cov= NULL, me.random.cov=NULL, mecov.random.cov=NULL, intercept="root",  
ultrametric=TRUE, support=NULL, convergence=NULL)
```

## BEST ESTIMATES & MODEL FIT - TLR8 group 0

### MODEL PARAMETERS

|                                | Estimate   |
|--------------------------------|------------|
| Rate of adaptation             | 16.9060288 |
| Phylogenetic half-life         | 0.0410000  |
| Phylogenetic correction factor | 0.9408495  |
| Stationary variance            | 3.2900000  |

### PRIMARY OPTIMA

UNKNOWN mapped to the root of the tree and includes the coefficient for the ancestral state (Ya)

#### Estimates Std.error

UNKNOWN 5.8583640 1.2414273

NO 1.5558946 0.4024705

YES 0.9097707 0.3409476

### MODEL FIT

#### Value

Support -123.91445

AIC 257.82890

AICc 258.90033

SIC 268.46457

r squared 20.12795

SST 77.60318

SSE 61.98325

```
> model.fit(ancestor, indata2$time, seq(0.001,0.1, 0.01), seq(3.1, 3.7, 0.01), response= indata2$TLR8,
me.response= NULL, fixed.fact=Group_0, fixed.cov= NULL, me.fixed.cov= NULL,
mecov.fixed.cov=NULL, random.cov= NULL, me.random.cov=NULL, mecov.random.cov=NULL,
intercept="root", ultrametric=TRUE, support=NULL, convergence=NULL)
```

## BEST ESTIMATES & MODEL FIT - TLR8 group 25

### MODEL PARAMETERS

|                                | Estimate   |
|--------------------------------|------------|
| Rate of adaptation             | 16.9060288 |
| Phylogenetic half-life         | 0.0410000  |
| Phylogenetic correction factor | 0.9408495  |
| Stationary variance            | 3.3500000  |

### PRIMARY OPTIMA

UNKNOWN mapped to the root of the tree and includes the coefficient for the ancestral state (Ya)

#### Estimates Std.error

|         |          |           |
|---------|----------|-----------|
| UNKNOWN | 5.990984 | 1.2472106 |
| NO      | 1.442845 | 0.4835486 |
| YES     | 1.072728 | 0.3106295 |

### MODEL FIT

|           | Value      |
|-----------|------------|
| Support   | -124.45568 |
| AIC       | 258.91137  |
| AICc      | 259.98279  |
| SIC       | 269.54704  |
| r squared | 18.72125   |
| SST       | 76.21327   |
| SSE       | 61.94520   |

```
> model.fit(ancestor, indata2$time, seq(0.001,0.1, 0.01), seq(3.3, 3.7, 0.01), response= indata2$TLR8,
me.response= NULL, fixed.fact=Group_25, fixed.cov= NULL, me.fixed.cov= NULL,
mecov.fixed.cov=NULL, random.cov= NULL, me.random.cov=NULL, mecov.random.cov=NULL,
intercept="root", ultrametric=TRUE, support=NULL, convergence=NULL)
```

## BEST ESTIMATES & MODEL FIT - TLR8 group 50

### MODEL PARAMETERS

|                                | Estimate   |
|--------------------------------|------------|
| Rate of adaptation             | 16.9060288 |
| Phylogenetic half-life         | 0.0410000  |
| Phylogenetic correction factor | 0.9408495  |
| Stationary variance            | 3.3300000  |

### PRIMARY OPTIMA

UNKNOWN mapped to the root of the tree and includes the coefficient for the ancestral state (Ya)

#### Estimates Std.error

UNKNOWN 6.0220382 1.2377241

NO 0.9751567 0.3641890

YES 1.3916402 0.3719837

### MODEL FIT

#### Value

Support -124.34093

AIC 258.68187

AICc 259.75330

SIC 269.31754

r squared 19.02160

SST 76.67101

SSE 62.08696

```
> model.fit(ancestor, indata2$time, seq(0.001,0.1, 0.01), seq(3.3, 3.7, 0.01), response= indata2$TLR8,
me.response= NULL, fixed.fact=Group_50, fixed.cov= NULL, me.fixed.cov= NULL,
mecov.fixed.cov=NULL, random.cov= NULL, me.random.cov=NULL, mecov.random.cov=NULL,
intercept="root", ultrametric=TRUE, support=NULL, convergence=NULL)
```



## BEST ESTIMATES & MODEL FIT - TLR8 group 75

### MODEL PARAMETERS

|                                | Estimate   |
|--------------------------------|------------|
| Rate of adaptation             | 16.9060288 |
| Phylogenetic half-life         | 0.0410000  |
| Phylogenetic correction factor | 0.9408495  |
| Stationary variance            | 3.3600000  |

### PRIMARY OPTIMA

UNKNOWN mapped to the root of the tree and includes the coefficient for the ancestral state (Ya)

#### Estimates Std.error

|         |          |           |
|---------|----------|-----------|
| UNKNOWN | 6.038627 | 1.2476796 |
| NO      | 1.141288 | 0.2862024 |
| YES     | 1.380672 | 0.6383280 |

### MODEL FIT

|           | Value      |
|-----------|------------|
| Support   | -124.60759 |
| AIC       | 259.21519  |
| AICc      | 260.28662  |
| SIC       | 269.85086  |
| r squared | 18.32199   |
| SST       | 75.98645   |
| SSE       | 62.06422   |

```
> model.fit(ancestor, indata2$time, seq(0.001,0.1, 0.01), seq(3.3, 3.7, 0.01), response= indata2$TLR8,  
me.response= NULL, fixed.fact=Group_75, fixed.cov= NULL, me.fixed.cov= NULL,  
mecov.fixed.cov=NULL, random.cov= NULL, me.random.cov=NULL, mecov.random.cov=NULL,  
intercept="root", ultrametric=TRUE, support=NULL, convergence=NULL)
```

## BEST ESTIMATES & MODEL FIT - TLR8 group minus 25

### MODEL PARAMETERS

|                                | Estimate   |
|--------------------------------|------------|
| Rate of adaptation             | 16.9060288 |
| Phylogenetic half-life         | 0.0410000  |
| Phylogenetic correction factor | 0.9408495  |
| Stationary variance            | 3.3500000  |

### PRIMARY OPTIMA

UNKNOWN mapped to the root of the tree and includes the coefficient for the ancestral state (Ya)

Estimates Std.error

UNKNOWN 6.0252608 1.2429907

NO 1.2893210 0.3234544

YES 0.9619736 0.4510656

### MODEL FIT

Value

Support -124.49214

AIC 258.98427

AICc 260.05570

SIC 269.61995

r squared 18.62558

SST 76.21327

SSE 62.01811

```
> model.fit(ancestor, indata2$time, seq(0.001,0.1, 0.01), seq(3.1, 3.7, 0.01), response= indata2$TLR8,
me.response= NULL, fixed.fact=Group_minus_25, fixed.cov= NULL, me.fixed.cov= NULL,
mecov.fixed.cov=NULL, random.cov= NULL, me.random.cov=NULL, mecov.random.cov=NULL,
intercept="root", ultrametric=TRUE, support=NULL, convergence=NULL)
```

## BEST ESTIMATES & MODEL FIT - TLR8 group minus 50

### MODEL PARAMETERS

|                                | Estimate   |
|--------------------------------|------------|
| Rate of adaptation             | 13.5911212 |
| Phylogenetic half-life         | 0.0510000  |
| Phylogenetic correction factor | 0.9264226  |
| Stationary variance            | 3.4000000  |

### PRIMARY OPTIMA

UNKNOWN mapped to the root of the tree and includes the coefficient for the ancestral state (Ya)

#### Estimates Std.error

|         |          |           |
|---------|----------|-----------|
| UNKNOWN | 5.591644 | 1.2010945 |
| NO      | 1.074254 | 0.2920025 |
| YES     | 1.199023 | 0.7783270 |

### MODEL FIT

|           | Value      |
|-----------|------------|
| Support   | -124.62085 |
| AIC       | 259.24170  |
| AICc      | 260.31312  |
| SIC       | 269.87737  |
| r squared | 16.34706   |
| SST       | 74.20444   |
| SSE       | 62.07419   |

```
> model.fit(ancestor, indata2$time, seq(0.001,0.1, 0.01), seq(3.1, 3.7, 0.01), response= indata2$TLR8,  
me.response= NULL, fixed.fact=Group_minus_50, fixed.cov= NULL, me.fixed.cov= NULL,  
mecov.fixed.cov=NULL, random.cov= NULL, me.random.cov=NULL, mecov.random.cov=NULL,  
intercept="root", ultrametric=TRUE, support=NULL, convergence=NULL)
```

## BEST ESTIMATES & MODEL FIT - TLR8 MHCII

### MODEL PARAMETERS

|                                | Estimate   |
|--------------------------------|------------|
| Rate of adaptation             | 16.9060288 |
| Phylogenetic half-life         | 0.0410000  |
| Phylogenetic correction factor | 0.9408495  |
| Stationary variance            | 3.3200000  |

### PRIMARY OPTIMA

UNKNOWN mapped to the root of the tree and includes the coefficient for the ancestral state (Ya)

#### Estimates Std.error

UNKNOWN 5.684552 1.2976515

No 1.644295 0.5386467

Yes 1.034836 0.3008714

### MODEL FIT

#### Value

Support -124.18068

AIC 258.36135

AICc 259.43278

SIC 268.99703

r squared 19.43909

SST 76.90195

SSE 61.95291

```
> model.fit(ancestor, indata3$time, seq(0.001,0.1, 0.01), seq(3.1, 3.7, 0.01), response=
indata3$TLR8, me.response= NULL, fixed.fact=indata3$MHCII, fixed.cov= NULL, me.fixed.cov= NULL,
mecov.fixed.cov=NULL, random.cov= NULL, me.random.cov=NULL, mecov.random.cov=NULL,
intercept="root", ultrametric=TRUE, support=NULL, convergence=NULL)
```

## BEST ESTIMATES & MODEL FIT - TLR8 group 0 + MHCII

### MODEL PARAMETERS

|                                | Estimate   |
|--------------------------------|------------|
| Rate of adaptation             | 22.3595865 |
| Phylogenetic half-life         | 0.0310000  |
| Phylogenetic correction factor | 0.9552765  |
| Stationary variance            | 3.1000000  |

### PRIMARY OPTIMA

UNKNOWN mapped to the root of the tree and includes the coefficient for the ancestral state (Ya)

#### Estimates Std.error

|         |           |           |
|---------|-----------|-----------|
| UNKNOWN | 5.5081865 | 1.3379683 |
| NoNO    | 2.7748094 | 0.6246435 |
| NoYES   | 0.7863605 | 0.7210838 |
| YesNO   | 1.1396624 | 0.4709201 |
| YesYES  | 0.9948441 | 0.3675523 |

### MODEL FIT

|           | Value      |
|-----------|------------|
| Support   | -122.46304 |
| AIC       | 258.92607  |
| AICc      | 261.00015  |
| SIC       | 273.81601  |
| r squared | 27.11397   |
| SST       | 85.15327   |
| SSE       | 62.06484   |

```
> model.fit(ancestor, indata3$time, seq(0.001,0.1, 0.01), seq(3, 3.6, 0.01), response=
indata3$TLR8, me.response= NULL, fixed.fact=Group_0_MHCII , fixed.cov= NULL, me.fixed.cov= NULL,
mecov.fixed.cov=NULL, random.cov= NULL, me.random.cov=NULL, mecov.random.cov=NULL,
intercept="root", ultrametric=TRUE, support=NULL, convergence=NULL)
```

## BEST ESTIMATES & MODEL FIT - TLR8 group 25 + MHCII

### MODEL PARAMETERS

|                                | Estimate   |
|--------------------------------|------------|
| Rate of adaptation             | 16.9060288 |
| Phylogenetic half-life         | 0.0410000  |
| Phylogenetic correction factor | 0.9408495  |
| Stationary variance            | 3.2800000  |

### PRIMARY OPTIMA

UNKNOWN mapped to the root of the tree and includes the coefficient for the ancestral state (Ya)

#### Estimates Std.error

|         |           |           |
|---------|-----------|-----------|
| UNKNOWN | 5.6499638 | 1.2905413 |
| NoNO    | 2.0307791 | 0.7137641 |
| NoYES   | 1.2263572 | 0.7395576 |
| YesNO   | 0.9711936 | 0.6443604 |
| YesYES  | 1.0524881 | 0.3375849 |

### MODEL FIT

|           | Value      |
|-----------|------------|
| Support   | -123.84106 |
| AIC       | 261.68211  |
| AICc      | 263.75618  |
| SIC       | 276.57205  |
| r squared | 20.31684   |
| SST       | 77.83978   |
| SSE       | 62.02519   |

```
> model.fit(ancestor, indata3$time, seq(0.001,0.1, 0.01), seq(3, 3.6, 0.01), response=
indata3$TLR8, me.response= NULL, fixed.fact=Group_25_MHCII , fixed.cov= NULL, me.fixed.cov=
NULL, mecov.fixed.cov=NULL, random.cov= NULL, me.random.cov=NULL, mecov.random.cov=NULL,
intercept="root", ultrametric=TRUE, support=NULL, convergence=NULL)
```

## BEST ESTIMATES & MODEL FIT - TLR8 group 50 + MHCII

### MODEL PARAMETERS

|                                | Estimate   |
|--------------------------------|------------|
| Rate of adaptation             | 16.9060288 |
| Phylogenetic half-life         | 0.0410000  |
| Phylogenetic correction factor | 0.9408495  |
| Stationary variance            | 3.2100000  |

### PRIMARY OPTIMA

UNKNOWN mapped to the root of the tree and includes the coefficient for the ancestral state (Ya)

#### Estimates Std.error

|         |           |           |
|---------|-----------|-----------|
| UNKNOWN | 5.8463339 | 1.2807175 |
| NoNO    | 0.4190979 | 0.9921280 |
| NoYES   | 2.0202578 | 0.5889784 |
| YesNO   | 1.0768274 | 0.3831597 |
| YesYES  | 0.9711968 | 0.4654550 |

### MODEL FIT

|           | Value      |
|-----------|------------|
| Support   | -123.11637 |
| AIC       | 260.23274  |
| AICc      | 262.30681  |
| SIC       | 275.12268  |
| r squared | 22.15806   |
| SST       | 79.53722   |
| SSE       | 61.91331   |

```
> model.fit(ancestor, indata3$time, seq(0.001,0.1, 0.01), seq(3, 3.6, 0.01), response=
indata3$TLR8, me.response= NULL, fixed.fact=Group_50_MHCII , fixed.cov= NULL, me.fixed.cov=
NULL, mecov.fixed.cov=NULL, random.cov= NULL, me.random.cov=NULL, mecov.random.cov=NULL,
intercept="root", ultrametric=TRUE, support=NULL, convergence=NULL)
```

## BEST ESTIMATES & MODEL FIT - TLR8 group 75 + MHCII

### MODEL PARAMETERS

|                                | Estimate   |
|--------------------------------|------------|
| Rate of adaptation             | 16.9060288 |
| Phylogenetic half-life         | 0.0410000  |
| Phylogenetic correction factor | 0.9408495  |
| Stationary variance            | 3.3100000  |

### PRIMARY OPTIMA

UNKNOWN mapped to the root of the tree and includes the coefficient for the ancestral state (Ya)

#### Estimates Std.error

|         |           |           |
|---------|-----------|-----------|
| UNKNOWN | 5.6715824 | 1.2967512 |
| NoNO    | 1.5639808 | 0.6273580 |
| NoYES   | 1.8182333 | 0.8824009 |
| YesNO   | 1.0416566 | 0.3180857 |
| YesYES  | 0.9790289 | 0.9137936 |

### MODEL FIT

|           | Value      |
|-----------|------------|
| Support   | -124.14774 |
| AIC       | 262.29548  |
| AICc      | 264.36955  |
| SIC       | 277.18542  |
| r squared | 19.52468   |
| SST       | 77.13428   |
| SSE       | 62.07406   |

```
> model.fit(ancestor, indata3$time, seq(0.001,0.1, 0.01), seq(3.3, 4.3, 0.01), response=
indata3$TLR8, me.response= NULL, fixed.fact=Group_75_MHCII , fixed.cov= NULL, me.fixed.cov=
NULL, mecov.fixed.cov=NULL, random.cov= NULL, me.random.cov=NULL, mecov.random.cov=NULL,
intercept="root", ultrametric=TRUE, support=NULL, convergence=NULL)
```



## BEST ESTIMATES & MODEL FIT - TLR8 group minus 50 + MHCII

### MODEL PARAMETERS

|                                | Estimate   |
|--------------------------------|------------|
| Rate of adaptation             | 16.9060288 |
| Phylogenetic half-life         | 0.0410000  |
| Phylogenetic correction factor | 0.9408495  |
| Stationary variance            | 3.3200000  |

### PRIMARY OPTIMA

UNKNOWN mapped to the root of the tree and includes the coefficient for the ancestral state (Ya)

#### Estimates Std.error

|         |           |           |
|---------|-----------|-----------|
| UNKNOWN | 5.7152705 | 1.3068208 |
| NoNO    | 1.5995507 | 0.5845279 |
| NoYES   | 1.8856347 | 1.3390323 |
| YesNO   | 1.0424670 | 0.3184890 |
| YesYES  | 0.9703738 | 0.9168541 |

### MODEL FIT

|           | Value      |
|-----------|------------|
| Support   | -124.15854 |
| AIC       | 262.31708  |
| AICc      | 264.39115  |
| SIC       | 277.20702  |
| r squared | 19.49666   |
| SST       | 76.90195   |
| SSE       | 61.90863   |

```
> model.fit(ancestor, indata3$time, seq(0.001,0.1, 0.01), seq(3, 3.6, 0.01), response=
indata3$TLR8, me.response= NULL, fixed.fact=Group_minus_50_MHCII , fixed.cov= NULL,
me.fixed.cov= NULL, mecov.fixed.cov=NULL, random.cov= NULL, me.random.cov=NULL,
mecov.random.cov=NULL, intercept="root", ultrametric=TRUE, support=NULL, convergence=NULL)
```

## BEST ESTIMATES & MODEL FIT – TLR8 group minus 25 + MHCII

### MODEL PARAMETERS

|                                | Estimate   |
|--------------------------------|------------|
| Rate of adaptation             | 16.9060288 |
| Phylogenetic half-life         | 0.0410000  |
| Phylogenetic correction factor | 0.9408495  |
| Stationary variance            | 3.2600000  |

### PRIMARY OPTIMA

UNKNOWN mapped to the root of the tree and includes the coefficient for the ancestral state (Ya)

#### Estimates Std.error

|         |           |           |
|---------|-----------|-----------|
| UNKNOWN | 5.4474577 | 1.3064438 |
| NoNO    | 2.0547246 | 0.6663428 |
| NoYES   | 0.9743304 | 0.8417862 |
| YesNO   | 1.0640415 | 0.3624955 |
| YesYES  | 0.9768794 | 0.5240148 |

### MODEL FIT

|           | Value      |
|-----------|------------|
| Support   | -123.64645 |
| AIC       | 261.29290  |
| AICc      | 263.36698  |
| SIC       | 276.18284  |
| r squared | 20.81549   |
| SST       | 78.31732   |
| SSE       | 62.01519   |

```
> model.fit(ancestor, indata3$time, seq(0.001,0.1, 0.01), seq(3, 3.6, 0.01), response=
indata3$TLR8, me.response= NULL, fixed.fact=Group_minus_25_MHCII, fixed.cov= NULL,
me.fixed.cov= NULL, mecov.fixed.cov=NULL, random.cov= NULL, me.random.cov=NULL,
mecov.random.cov=NULL, intercept="root", ultrametric=TRUE, support=NULL, convergence=NULL)
```

## BEST ESTIMATES & MODEL FIT - TLR9 phylogeny

### MODEL PARAMETERS

|                                | Estimate  |
|--------------------------------|-----------|
| Rate of adaptation             | 2.7725887 |
| Phylogenetic half-life         | 0.2500000 |
| Phylogenetic correction factor | 0.6618683 |
| Stationary variance            | 3.5000000 |

### PRIMARY OPTIMA

|              | Estimate | Std.error |
|--------------|----------|-----------|
| Theta_global | 1.410625 | 0.4140082 |

### MODEL FIT

|           | Value         |
|-----------|---------------|
| Support   | -1.187489e+02 |
| AIC       | 2.434977e+02  |
| AICc      | 2.439115e+02  |
| SIC       | 2.498791e+02  |
| r squared | -2.289925e-14 |
| SST       | 6.205816e+01  |
| SSE       | 6.205816e+01  |

```
> model.fit(ancestor, indata3$time, seq(0.00,0.6, 0.01), seq(1, 10, 0.1), response= indata3$TLR9,
me.response= NULL, fixed.fact=NULL, fixed.cov= NULL, me.fixed.cov= NULL, mecov.fixed.cov=NULL,
random.cov= NULL, me.random.cov=NULL, mecov.random.cov=NULL, intercept="root",
ultrametric=TRUE, support=NULL, convergence=NULL)
```

## BEST ESTIMATES & MODEL FIT – TLR9 group 0

### MODEL PARAMETERS

|                                | Estimate  |
|--------------------------------|-----------|
| Rate of adaptation             | 4.3052620 |
| Phylogenetic half-life         | 0.1610000 |
| Phylogenetic correction factor | 0.7708612 |
| Stationary variance            | 2.6900000 |

### PRIMARY OPTIMA

UNKNOWN mapped to the root of the tree and includes the coefficient for the ancestral state (Ya)

#### Estimates Std.error

|         |             |           |
|---------|-------------|-----------|
| UNKNOWN | 4.90548398  | 0.9785545 |
| NO      | 1.03000046  | 0.5615206 |
| YES     | -0.02680546 | 0.4932277 |

### MODEL FIT

#### Value

|           |            |
|-----------|------------|
| Support   | -113.58672 |
| AIC       | 237.17343  |
| AICc      | 238.24486  |
| SIC       | 247.80910  |
| r squared | 19.98517   |
| SST       | 77.39867   |
| SSE       | 61.93042   |

```
> model.fit(ancestor, indata2$time, seq(0.001,0.24, 0.01), seq(2.4, 3, 0.01), response= indata2$TLR9,
me.response= NULL, fixed.fact=Group_0, fixed.cov= NULL, me.fixed.cov= NULL,
mecov.fixed.cov=NULL, random.cov= NULL, me.random.cov=NULL, mecov.random.cov=NULL,
intercept="root", ultrametric=TRUE, support=NULL, convergence=NULL)
```

## BEST ESTIMATES & MODEL FIT - TLR9 group 25

### MODEL PARAMETERS

|                                | Estimate  |
|--------------------------------|-----------|
| Rate of adaptation             | 4.3052620 |
| Phylogenetic half-life         | 0.1610000 |
| Phylogenetic correction factor | 0.7708612 |
| Stationary variance            | 2.7800000 |

### PRIMARY OPTIMA

UNKNOWN mapped to the root of the tree and includes the coefficient for the ancestral state (Ya)

#### Estimates Std.error

UNKNOWN 4.7905910 1.0008819

NO 0.8909195 0.7503926

YES 0.3067360 0.4442190

### MODEL FIT

#### Value

Support -114.63289

AIC 239.26577

AICc 240.33720

SIC 249.90144

r squared 17.23875

SST 74.89296

SSE 61.98235

```
> model.fit(ancestor, indata2$time, seq(0.001,0.24, 0.01), seq(2.4, 3, 0.01), response= indata2$TLR9,
me.response= NULL, fixed.fact=Group_25, fixed.cov= NULL, me.fixed.cov= NULL,
mecov.fixed.cov=NULL, random.cov= NULL, me.random.cov=NULL, mecov.random.cov=NULL,
intercept="root", ultrametric=TRUE, support=NULL, convergence=NULL)
```

## BEST ESTIMATES & MODEL FIT - TLR9 group 50

### MODEL PARAMETERS

|                                | Estimate  |
|--------------------------------|-----------|
| Rate of adaptation             | 4.0534923 |
| Phylogenetic half-life         | 0.1710000 |
| Phylogenetic correction factor | 0.7575823 |
| Stationary variance            | 2.8200000 |

### PRIMARY OPTIMA

UNKNOWN mapped to the root of the tree and includes the coefficient for the ancestral state (Ya)

#### Estimates Std.error

UNKNOWN 4.7104356 1.0032812

NO 0.2136656 0.5339074

YES 0.5316584 0.5847253

### MODEL FIT

#### Value

Support -114.80147

AIC 239.60293

AICc 240.67436

SIC 250.23860

r squared 15.48955

SST 73.48147

SSE 62.09952

```
> model.fit(ancestor, indata2$time, seq(0.001,0.2, 0.01), seq(2.4, 3, 0.01), response= indata2$TLR9,  
me.response= NULL, fixed.fact=Group_50, fixed.cov= NULL, me.fixed.cov= NULL,  
mecov.fixed.cov=NULL, random.cov= NULL, me.random.cov=NULL, mecov.random.cov=NULL,  
intercept="root", ultrametric=TRUE, support=NULL, convergence=NULL)
```

## BEST ESTIMATES & MODEL FIT - TLR9 group 75

### MODEL PARAMETERS

|                                | Estimate  |
|--------------------------------|-----------|
| Rate of adaptation             | 4.3052620 |
| Phylogenetic half-life         | 0.1610000 |
| Phylogenetic correction factor | 0.7708612 |
| Stationary variance            | 2.7200000 |

### PRIMARY OPTIMA

UNKNOWN mapped to the root of the tree and includes the coefficient for the ancestral state (Ya)

#### Estimates Std.error

UNKNOWN 4.9086983 0.9841078

NO 0.2402895 0.4375494

YES 1.4586448 0.8695819

### MODEL FIT

#### Value

Support -113.99901

AIC 237.99802

AICc 239.06945

SIC 248.63369

r squared 18.91388

SST 76.54501

SSE 62.06738

```
> model.fit(ancestor, indata2$time, seq(0.001,0.28, 0.01), seq(2, 3.4, 0.01), response= indata2$TLR9,  
me.response= NULL, fixed.fact=Group_75, fixed.cov= NULL, me.fixed.cov= NULL,  
mecov.fixed.cov=NULL, random.cov= NULL, me.random.cov=NULL, mecov.random.cov=NULL,  
intercept="root", ultrametric=TRUE, support=NULL, convergence=NULL)
```

## BEST ESTIMATES & MODEL FIT - TLR9 group minus 25

### MODEL PARAMETERS

|                                | Estimate  |
|--------------------------------|-----------|
| Rate of adaptation             | 4.0534923 |
| Phylogenetic half-life         | 0.1710000 |
| Phylogenetic correction factor | 0.7575823 |
| Stationary variance            | 2.7800000 |

### PRIMARY OPTIMA

UNKNOWN mapped to the root of the tree and includes the coefficient for the ancestral state (Ya)

#### Estimates Std.error

|         |            |           |
|---------|------------|-----------|
| UNKNOWN | 4.6624669  | 0.9972899 |
| NO      | 0.6239572  | 0.5167347 |
| YES     | -0.1019681 | 0.6185419 |

### MODEL FIT

#### Value

|           |            |
|-----------|------------|
| Support   | -114.35663 |
| AIC       | 238.71326  |
| AICc      | 239.78469  |
| SIC       | 249.34893  |
| r squared | 16.69357   |
| SST       | 74.53875   |
| SSE       | 62.09557   |

```
> model.fit(ancestor, indata2$time, seq(0.001,0.24, 0.01), seq(2.4, 3, 0.01), response= indata2$TLR9,  
me.response= NULL, fixed.fact=Group_minus_25, fixed.cov= NULL, me.fixed.cov= NULL,  
mecov.fixed.cov=NULL, random.cov= NULL, me.random.cov=NULL, mecov.random.cov=NULL,  
intercept="root", ultrametric=TRUE, support=NULL, convergence=NULL)
```



## BEST ESTIMATES & MODEL FIT – TLR9 group minus 50

### MODEL PARAMETERS

|                                | Estimate  |
|--------------------------------|-----------|
| Rate of adaptation             | 4.0534923 |
| Phylogenetic half-life         | 0.1710000 |
| Phylogenetic correction factor | 0.7575823 |
| Stationary variance            | 2.8000000 |

### PRIMARY OPTIMA

UNKNOWN mapped to the root of the tree and includes the coefficient for the ancestral state (Ya)

Estimates Std.error

UNKNOWN 4.7207924 0.9997175

NO 0.4531282 0.4657740

YES -0.4061054 0.9834336

### MODEL FIT

Value

Support -114.54596

AIC 239.09192

AICc 240.16335

SIC 249.72760

r squared 16.18313

SST 74.00633

SSE 62.02979

```
> model.fit(ancestor, indata2$time, seq(0.001,0.24, 0.01), seq(2.4, 3, 0.01), response= indata2$TLR9,
me.response= NULL, fixed.fact=Group_minus_50, fixed.cov= NULL, me.fixed.cov= NULL,
mecov.fixed.cov=NULL, random.cov= NULL, me.random.cov=NULL, mecov.random.cov=NULL,
intercept="root", ultrametric=TRUE, support=NULL, convergence=NULL)
```

## BEST ESTIMATES & MODEL FIT - TLR9 + MHC

### MODEL PARAMETERS

|                                | Estimate  |
|--------------------------------|-----------|
| Rate of adaptation             | 4.9159375 |
| Phylogenetic half-life         | 0.1410000 |
| Phylogenetic correction factor | 0.7980708 |
| Stationary variance            | 2.6600000 |

### PRIMARY OPTIMA

UNKNOWN mapped to the root of the tree and includes the coefficient for the ancestral state (Ya)

#### Estimates Std.error

UNKNOWN 4.8358547 1.0086785

No 2.1206591 1.0813497

Yes 0.4504188 0.3750874

### MODEL FIT

#### Value

Support -113.96842

AIC 237.93685

AICc 239.00827

SIC 248.57252

r squared 22.41454

SST 80.00114

SSE 62.06925

```
> model.fit(ancestor, indata3$time, seq(0.001,0.24, 0.01), seq(2.5, 3, 0.01), response=
indata3$TLR9, me.response= NULL, fixed.fact=indata3$MHCII, fixed.cov= NULL, me.fixed.cov= NULL,
mecov.fixed.cov=NULL, random.cov= NULL, me.random.cov=NULL, mecov.random.cov=NULL,
intercept="root", ultrametric=TRUE, support=NULL, convergence=NULL)
```

## BEST ESTIMATES & MODEL FIT – TLR9 group 0 + MHCII

### MODEL PARAMETERS

|                                | Estimate  |
|--------------------------------|-----------|
| Rate of adaptation             | 8.5573726 |
| Phylogenetic half-life         | 0.0810000 |
| Phylogenetic correction factor | 0.8831642 |
| Stationary variance            | 1.9400000 |

### PRIMARY OPTIMA

UNKNOWN mapped to the root of the tree and includes the coefficient for the ancestral state (Ya)

#### Estimates Std.error

UNKNOWN 5.2355351 0.9269600

NoNO 5.3595659 0.7952621

NoYES 0.6606602 0.7439025

YesNO 0.9759444 0.3906908

YesYES 0.8283597 0.3103422

### MODEL FIT

#### Value

Support -106.20238

AIC 226.40476

AICc 228.47883

SIC 241.29470

r squared 53.52633

SST 133.68217

SSE 62.12702

```
> model.fit(ancestor, indata3$time, seq(0.001,0.24, 0.01), seq(1.5, 2.5, 0.01), response=
indata3$TLR9, me.response= NULL, fixed.fact=Group_0_MHCII , fixed.cov= NULL, me.fixed.cov= NULL,
mecov.fixed.cov=NULL, random.cov= NULL, me.random.cov=NULL, mecov.random.cov=NULL,
intercept="root", ultrametric=TRUE, support=NULL, convergence=NULL)
```

## BEST ESTIMATES & MODEL FIT - TLR9 group 25 + MHCII

### MODEL PARAMETERS

|                                | Estimate  |
|--------------------------------|-----------|
| Rate of adaptation             | 5.7284891 |
| Phylogenetic half-life         | 0.1210000 |
| Phylogenetic correction factor | 0.8260016 |
| Stationary variance            | 2.4100000 |

### PRIMARY OPTIMA

UNKNOWN mapped to the root of the tree and includes the coefficient for the ancestral state (Ya)

#### Estimates Std.error

UNKNOWN 5.2169514 0.9779169

NoNO 3.7279511 1.0997363

NoYES 0.8922586 1.0921411

YesNO 0.2904620 0.6776396

YesYES 0.6353561 0.3476031

### MODEL FIT

#### Value

Support -111.52928

AIC 237.05856

AICc 239.13263

SIC 251.94850

r squared 32.69036

SST 92.10708

SSE 61.99694

```
> model.fit(ancestor, indata3$time, seq(0.001,0.24, 0.01), seq(2.2, 3, 0.01), response=
indata3$TLR9, me.response= NULL, fixed.fact=Group_25_MHCII , fixed.cov= NULL, me.fixed.cov=
NULL, mecov.fixed.cov=NULL, random.cov= NULL, me.random.cov=NULL, mecov.random.cov=NULL,
intercept="root", ultrametric=TRUE, support=NULL, convergence=NULL)
```

## BEST ESTIMATES & MODEL FIT - TLR9 group 50 + MHCII

### MODEL PARAMETERS

|                                | Estimate  |
|--------------------------------|-----------|
| Rate of adaptation             | 5.2911999 |
| Phylogenetic half-life         | 0.1310000 |
| Phylogenetic correction factor | 0.8119587 |
| Stationary variance            | 2.6000000 |

### PRIMARY OPTIMA

UNKNOWN mapped to the root of the tree and includes the coefficient for the ancestral state (Ya)

#### Estimates Std.error

UNKNOWN 5.0964524 1.0108911

NoNO 1.0000830 1.5794960

NoYES 2.5091732 1.0470249

YesNO 0.5173308 0.4309232

YesYES 0.4629452 0.5190083

### MODEL FIT

#### Value

Support -113.51586

AIC 241.03171

AICc 243.10579

SIC 255.92165

r squared 25.71577

SST 83.35805

SSE 61.92189

```
> model.fit(ancestor, indata3$time, seq(0.001,0.24, 0.01), seq(2.2, 3, 0.01), response=
indata3$TLR9, me.response= NULL, fixed.fact=Group_50_MHCII , fixed.cov= NULL, me.fixed.cov=
NULL, mecov.fixed.cov=NULL, random.cov= NULL, me.random.cov=NULL, mecov.random.cov=NULL,
intercept="root", ultrametric=TRUE, support=NULL, convergence=NULL)
```

## BEST ESTIMATES & MODEL FIT - TLR9 group 75 + MHCII

### MODEL PARAMETERS

|                                | Estimate  |
|--------------------------------|-----------|
| Rate of adaptation             | 5.7284891 |
| Phylogenetic half-life         | 0.1210000 |
| Phylogenetic correction factor | 0.8260016 |
| Stationary variance            | 2.4600000 |

### PRIMARY OPTIMA

UNKNOWN mapped to the root of the tree and includes the coefficient for the ancestral state (Ya)

#### Estimates Std.error

UNKNOWN 5.1795508 0.9855519

NoNO 1.5265383 0.9921389

NoYES 4.2145472 1.3239198

YesNO 0.5368118 0.3411561

YesYES 0.8591806 0.8849256

### MODEL FIT

#### Value

Support -112.15606

AIC 238.31212

AICc 240.38620

SIC 253.20206

r squared 31.31560

SST 90.23499

SSE 61.97736

```
> model.fit(ancestor, indata3$time, seq(0.001,0.24, 0.01), seq(2.2, 3, 0.01), response=
indata3$TLR9, me.response= NULL, fixed.fact=Group_75_MHCII , fixed.cov= NULL, me.fixed.cov=
NULL, mecov.fixed.cov=NULL, random.cov= NULL, me.random.cov=NULL, mecov.random.cov=NULL,
intercept="root", ultrametric=TRUE, support=NULL, convergence=NULL)
```

## BEST ESTIMATES & MODEL FIT – TLR9 group minus 25 + MHCII

### MODEL PARAMETERS

|                                | Estimate  |
|--------------------------------|-----------|
| Rate of adaptation             | 8.5573726 |
| Phylogenetic half-life         | 0.0810000 |
| Phylogenetic correction factor | 0.8831642 |
| Stationary variance            | 1.9900000 |

### PRIMARY OPTIMA

UNKNOWN mapped to the root of the tree and includes the coefficient for the ancestral state (Ya)

#### Estimates Std.error

UNKNOWN 5.2313863 0.9393885

NoNO 4.9401744 0.7576044

NoYES 0.3912585 0.8023749

YesNO 0.8823702 0.3001230

YesYES 0.8908535 0.4302339

### MODEL FIT

#### Value

Support -106.99338

AIC 227.98675

AICc 230.06083

SIC 242.87669

r squared 52.32525

SST 130.32332

SSE 62.13131

```
> model.fit(ancestor, indata3$time, seq(0.001,0.24, 0.01), seq(1.5, 3.6, 0.01), response=
indata3$TLR9, me.response= NULL, fixed.fact=Group_minus_25_MHCII, fixed.cov= NULL,
me.fixed.cov= NULL, mecov.fixed.cov=NULL, random.cov= NULL, me.random.cov=NULL,
mecov.random.cov=NULL, intercept="root", ultrametric=TRUE, support=NULL, convergence=NULL)
```

## BEST ESTIMATES & MODEL FIT – TLR9 group minus 50 + MHCII

### MODEL PARAMETERS

|                                | Estimate  |
|--------------------------------|-----------|
| Rate of adaptation             | 5.2911999 |
| Phylogenetic half-life         | 0.1310000 |
| Phylogenetic correction factor | 0.8119587 |
| Stationary variance            | 2.4800000 |

### PRIMARY OPTIMA

UNKNOWN mapped to the root of the tree and includes the coefficient for the ancestral state (Ya)

#### Estimates Std.error

UNKNOWN 4.8799470 0.9823439

NoNO 2.9307760 1.0429763

NoYES -0.6770935 1.7392722

YesNO 0.5417445 0.3585765

YesYES 0.4117317 0.9292239

### MODEL FIT

#### Value

Support -112.04018

AIC 238.08036

AICc 240.15443

SIC 252.97030

r squared 29.16907

SST 87.39151

SSE 61.90021

```
> model.fit(ancestor, indata3$time, seq(0.001,0.24, 0.01), seq(2.2, 2.7, 0.01), response=
indata3$TLR9, me.response= NULL, fixed.fact=Group_minus_50_MHCII, fixed.cov= NULL,
me.fixed.cov= NULL, mecov.fixed.cov=NULL, random.cov= NULL, me.random.cov=NULL,
mecov.random.cov=NULL, intercept="root", ultrametric=TRUE, support=NULL, convergence=NULL)
```



## BEST ESTIMATES & MODEL FIT - TLR22 phylogeny

### MODEL PARAMETERS

|                                | Estimate   |
|--------------------------------|------------|
| Rate of adaptation             | 8.6643398  |
| Phylogenetic half-life         | 0.0800000  |
| Phylogenetic correction factor | 0.8846043  |
| Stationary variance            | 59.0000000 |

### PRIMARY OPTIMA

|              | Estimate | Std.error |
|--------------|----------|-----------|
| Theta_global | 3.740316 | 1.070306  |

### MODEL FIT

|           | Value      |
|-----------|------------|
| Support   | -211.93005 |
| AIC       | 429.86009  |
| AICc      | 430.27389  |
| SIC       | 436.24150  |
| r squared | 0.00000    |
| SST       | 61.79337   |
| SSE       | 61.79337   |

```
> model.fit(ancestor, indata3$time, seq(0.00,0.5, 0.005), seq(30, 80, 1), response= indata3$TLR22,
me.response= NULL, fixed.fact=NULL, fixed.cov= NULL, me.fixed.cov= NULL, mecov.fixed.cov=NULL,
random.cov= NULL, me.random.cov=NULL, mecov.random.cov=NULL, intercept="root",
ultrametric=TRUE, support=NULL, convergence=NULL)
```

## BEST ESTIMATES & MODEL FIT - TLR22 group 0

### MODEL PARAMETERS

|                                | Estimate   |
|--------------------------------|------------|
| Rate of adaptation             | 17.3286795 |
| Phylogenetic half-life         | 0.0400000  |
| Phylogenetic correction factor | 0.9422922  |
| Stationary variance            | 49.4800000 |

### PRIMARY OPTIMA

UNKNOWN mapped to the root of the tree and includes the coefficient for the ancestral state (Ya)

#### Estimates Std.error

UNKNOWN 15.276753 4.837481

NO 5.317817 1.555059

YES 1.698537 1.320510

### MODEL FIT

#### Value

Support -207.98755

AIC 425.97510

AICc 427.04653

SIC 436.61077

r squared 13.99005

SST 72.07980

SSE 61.99579

```
> model.fit(ancestor, indata2$time, seq(0.01,0.07, 0.01), seq(49.3, 49.6, 0.01), response=
indata2$TLR22, me.response= NULL, fixed.fact=Group_0, fixed.cov= NULL, me.fixed.cov= NULL,
mecov.fixed.cov=NULL, random.cov= NULL, me.random.cov=NULL, mecov.random.cov=NULL,
intercept="root", ultrametric=TRUE, support=NULL, convergence=NULL)
```

## BEST ESTIMATES & MODEL FIT - TLR22 group 25

### MODEL PARAMETERS

|                                | Estimate   |
|--------------------------------|------------|
| Rate of adaptation             | 13.8629436 |
| Phylogenetic half-life         | 0.0500000  |
| Phylogenetic correction factor | 0.9278653  |
| Stationary variance            | 52.3700000 |

### PRIMARY OPTIMA

UNKNOWN mapped to the root of the tree and includes the coefficient for the ancestral state (Ya)

#### Estimates Std.error

UNKNOWN 15.274336 4.757888

NO 3.363055 1.982522

YES 2.832286 1.248532

### MODEL FIT

#### Value

Support -209.393675

AIC 428.787350

AICc 429.858779

SIC 439.423022

r squared 8.857167

SST 68.031163

SSE 62.005530

```
> model.fit(ancestor, indata2$time, seq(0.01,0.07, 0.01), seq(49.3, 53, 0.01), response=
indata2$TLR22, me.response= NULL, fixed.fact=Group_25, fixed.cov= NULL, me.fixed.cov= NULL,
mecov.fixed.cov=NULL, random.cov= NULL, me.random.cov=NULL, mecov.random.cov=NULL,
intercept="root", ultrametric=TRUE, support=NULL, convergence=NULL)
```

## BEST ESTIMATES & MODEL FIT - TLR22 group 50

### MODEL PARAMETERS

|                                | Estimate   |
|--------------------------------|------------|
| Rate of adaptation             | 17.3286795 |
| Phylogenetic half-life         | 0.0400000  |
| Phylogenetic correction factor | 0.9422922  |
| Stationary variance            | 49.6500000 |

### PRIMARY OPTIMA

UNKNOWN mapped to the root of the tree and includes the coefficient for the ancestral state (Ya)

#### Estimates Std.error

UNKNOWN 16.059778 4.801144

NO 1.538135 1.404394

YES 4.949255 1.431323

### MODEL FIT

#### Value

Support -208.09311

AIC 426.18622

AICc 427.25765

SIC 436.82190

r squared 13.69667

SST 71.83300

SSE 61.99427

```
> model.fit(ancestor, indata2$time, seq(0.01,0.07, 0.01), seq(49.3, 49.9, 0.01), response=
indata2$TLR22, me.response= NULL, fixed.fact=Group_50, fixed.cov= NULL, me.fixed.cov= NULL,
mecov.fixed.cov=NULL, random.cov= NULL, me.random.cov=NULL, mecov.random.cov=NULL,
intercept="root", ultrametric=TRUE, support=NULL, convergence=NULL)
```

## BEST ESTIMATES & MODEL FIT - TLR22 group 75

### MODEL PARAMETERS

|                                | Estimate   |
|--------------------------------|------------|
| Rate of adaptation             | 17.3286795 |
| Phylogenetic half-life         | 0.0400000  |
| Phylogenetic correction factor | 0.9422922  |
| Stationary variance            | 43.3500000 |

### PRIMARY OPTIMA

UNKNOWN mapped to the root of the tree and includes the coefficient for the ancestral state (Ya)

#### Estimates Std.error

UNKNOWN 14.896336 4.502874

NO 1.840849 1.025818

YES 10.526348 2.283833

### MODEL FIT

#### Value

Support -203.89235

AIC 417.78470

AICc 418.85613

SIC 428.42038

r squared 24.63373

SST 82.27239

SSE 62.00563

```
> model.fit(ancestor, indata2$time, seq(0.01,0.07, 0.01), seq(43.1, 43.6, 0.01), response=
indata2$TLR22, me.response= NULL, fixed.fact=Group_75, fixed.cov= NULL, me.fixed.cov= NULL,
mecov.fixed.cov=NULL, random.cov= NULL, me.random.cov=NULL, mecov.random.cov=NULL,
intercept="root", ultrametric=TRUE, support=NULL, convergence=NULL)
```

## BEST ESTIMATES & MODEL FIT - TLR22 group minus 25

### MODEL PARAMETERS

|                                | Estimate   |
|--------------------------------|------------|
| Rate of adaptation             | 13.8629436 |
| Phylogenetic half-life         | 0.0500000  |
| Phylogenetic correction factor | 0.9278653  |
| Stationary variance            | 51.9400000 |

### PRIMARY OPTIMA

UNKNOWN mapped to the root of the tree and includes the coefficient for the ancestral state (Ya)

#### Estimates Std.error

UNKNOWN 15.152706 4.718837

NO 3.549613 1.308157

YES 1.880127 1.802368

### MODEL FIT

#### Value

Support -209.134644

AIC 428.269288

AICc 429.340716

SIC 438.904960

r squared 9.615569

SST 68.594379

SSE 61.998639

```
> model.fit(ancestor, indata2$time, seq(0.01,0.07, 0.01), seq(51.8, 52, 0.01), response=
indata2$TLR22, me.response= NULL, fixed.fact=Group_minus_25, fixed.cov= NULL, me.fixed.cov=
NULL, mecov.fixed.cov=NULL, random.cov= NULL, me.random.cov=NULL, mecov.random.cov=NULL,
intercept="root", ultrametric=TRUE, support=NULL, convergence=NULL)
```

## BEST ESTIMATES & MODEL FIT - TLR22 group minus 50

### MODEL PARAMETERS

|                                | Estimate   |
|--------------------------------|------------|
| Rate of adaptation             | 13.8629436 |
| Phylogenetic half-life         | 0.0500000  |
| Phylogenetic correction factor | 0.9278653  |
| Stationary variance            | 52.1700000 |

### PRIMARY OPTIMA

UNKNOWN mapped to the root of the tree and includes the coefficient for the ancestral state (Ya)

#### Estimates Std.error

UNKNOWN 15.305218 4.721236

NO 3.189032 1.140366

YES 1.442420 3.043186

### MODEL FIT

#### Value

Support -209.275032

AIC 428.550065

AICc 429.621493

SIC 439.185736

r squared 9.205321

SST 68.291969

SSE 62.005474

```
> model.fit(ancestor, indata2$time, seq(0.01,0.07, 0.01), seq(52, 52.3, 0.01), response=
indata2$TLR22, me.response= NULL, fixed.fact=Group_minus_50, fixed.cov= NULL, me.fixed.cov=
NULL, mecov.fixed.cov=NULL, random.cov= NULL, me.random.cov=NULL, mecov.random.cov=NULL,
intercept="root", ultrametric=TRUE, support=NULL, convergence=NULL)
```

## BEST ESTIMATES & MODEL FIT - TLR22 + MHCII

### MODEL PARAMETERS

|                                | Estimate   |
|--------------------------------|------------|
| Rate of adaptation             | 23.1049060 |
| Phylogenetic half-life         | 0.0300000  |
| Phylogenetic correction factor | 0.9567191  |
| Stationary variance            | 49.6700000 |

### PRIMARY OPTIMA

UNKNOWN mapped to the root of the tree and includes the coefficient for the ancestral state (Ya)

#### Estimates Std.error

UNKNOWN 15.449406 5.296066

No 6.339786 1.905175

Yes 2.395662 1.159599

### MODEL FIT

#### Value

Support -208.46144

AIC 426.92288

AICc 427.99431

SIC 437.55855

r squared 14.52989

SST 72.54634

SSE 62.00544

```
> model.fit(ancestor, indata3$time, seq(0.01,0.07, 0.01), seq(46.8, 50, 0.01), response=
indata3$TLR22, me.response= NULL, fixed.fact=indata3$MHCII, fixed.cov= NULL, me.fixed.cov= NULL,
mecov.fixed.cov=NULL, random.cov= NULL, me.random.cov=NULL, mecov.random.cov=NULL,
intercept="root", ultrametric=TRUE, support=NULL, convergence=NULL)
```



## BEST ESTIMATES & MODEL FIT - TLR22 group 0 + MHCII

### MODEL PARAMETERS

|                                | Estimate   |
|--------------------------------|------------|
| Rate of adaptation             | 23.1049060 |
| Phylogenetic half-life         | 0.0300000  |
| Phylogenetic correction factor | 0.9567191  |
| Stationary variance            | 47.4500000 |

### PRIMARY OPTIMA

UNKNOWN mapped to the root of the tree and includes the coefficient for the ancestral state (Ya)

#### Estimates Std.error

UNKNOWN 14.370374 5.268514

NoNO 8.044236 2.418499

NoYES 4.010130 2.812764

YesNO 4.281291 1.842147

YesYES 1.248559 1.437704

### MODEL FIT

#### Value

Support -207.04178

AIC 428.08356

AICc 430.15763

SIC 442.97350

r squared 18.35575

SST 75.94050

SSE 62.00105

```
> model.fit(ancestor, indata3$time, seq(0.01,0.05, 0.01), seq(44, 50, 0.01), response=
indata3$TLR22, me.response= NULL, fixed.fact=Group_0_MHCII , fixed.cov= NULL, me.fixed.cov=
NULL, mecov.fixed.cov=NULL, random.cov= NULL, me.random.cov=NULL, mecov.random.cov=NULL,
intercept="root", ultrametric=TRUE, support=NULL, convergence=NULL)
```

## BEST ESTIMATES & MODEL FIT - TLR22 group 25 + MHCII

### MODEL PARAMETERS

|                                | Estimate   |
|--------------------------------|------------|
| Rate of adaptation             | 23.1049060 |
| Phylogenetic half-life         | 0.0300000  |
| Phylogenetic correction factor | 0.9567191  |
| Stationary variance            | 48.6300000 |

### PRIMARY OPTIMA

UNKNOWN mapped to the root of the tree and includes the coefficient for the ancestral state (Ya)

#### Estimates Std.error

|         |            |          |
|---------|------------|----------|
| UNKNOWN | 15.1219338 | 5.251783 |
| NoNO    | 7.9505573  | 2.532362 |
| NoYES   | 4.5746238  | 2.642823 |
| YesNO   | 0.9828537  | 2.468415 |
| YesYES  | 2.7853999  | 1.295901 |

### MODEL FIT

#### Value

|           |            |
|-----------|------------|
| Support   | -207.80551 |
| AIC       | 429.61103  |
| AICc      | 431.68510  |
| SIC       | 444.50097  |
| r squared | 16.31934   |
| SST       | 74.09781   |
| SSE       | 62.00554   |

```
> model.fit(ancestor, indata3$time, seq(0.01,0.05, 0.01), seq(44, 50, 0.01), response=
indata3$TLR22, me.response= NULL, fixed.fact=Group_25_MHCII , fixed.cov= NULL, me.fixed.cov=
NULL, mecov.fixed.cov=NULL, random.cov= NULL, me.random.cov=NULL, mecov.random.cov=NULL,
intercept="root", ultrametric=TRUE, support=NULL, convergence=NULL)
```

## BEST ESTIMATES & MODEL FIT - TLR22 group 50 + MHCII

### MODEL PARAMETERS

|                                | Estimate   |
|--------------------------------|------------|
| Rate of adaptation             | 23.1049060 |
| Phylogenetic half-life         | 0.0300000  |
| Phylogenetic correction factor | 0.9567191  |
| Stationary variance            | 48.1500000 |

### PRIMARY OPTIMA

UNKNOWN mapped to the root of the tree and includes the coefficient for the ancestral state (Ya)

#### Estimates Std.error

|         |           |          |
|---------|-----------|----------|
| UNKNOWN | 15.633445 | 5.238683 |
| NoNO    | 5.158900  | 3.555368 |
| NoYES   | 6.712135  | 2.101357 |
| YesNO   | 1.129272  | 1.480123 |
| YesYES  | 4.255788  | 1.794038 |

### MODEL FIT

|           | Value      |
|-----------|------------|
| Support   | -207.49638 |
| AIC       | 428.99275  |
| AICc      | 431.06683  |
| SIC       | 443.88269  |
| r squared | 17.14967   |
| SST       | 74.83648   |
| SSE       | 62.00228   |

```
> model.fit(ancestor, indata3$time, seq(0.01,0.06, 0.01), seq(44, 60, 0.01), response=
indata3$TLR22, me.response= NULL, fixed.fact=Group_50_MHCII , fixed.cov= NULL, me.fixed.cov=
NULL, mecov.fixed.cov=NULL, random.cov= NULL, me.random.cov=NULL, mecov.random.cov=NULL,
intercept="root", ultrametric=TRUE, support=NULL, convergence=NULL)
```

## BEST ESTIMATES & MODEL FIT - TLR22 group 75 + MHCII

### MODEL PARAMETERS

|                                | Estimate   |
|--------------------------------|------------|
| Rate of adaptation             | 23.1049060 |
| Phylogenetic half-life         | 0.0300000  |
| Phylogenetic correction factor | 0.9567191  |
| Stationary variance            | 40.5000000 |

### PRIMARY OPTIMA

UNKNOWN mapped to the root of the tree and includes the coefficient for the ancestral state (Ya)

#### Estimates Std.error

|         |           |          |
|---------|-----------|----------|
| UNKNOWN | 15.032341 | 4.794099 |
| NoNO    | 5.026109  | 2.023606 |
| NoYES   | 9.151258  | 2.856095 |
| YesNO   | 1.109897  | 1.108735 |
| YesYES  | 13.008162 | 3.184843 |

### MODEL FIT

|           | Value      |
|-----------|------------|
| Support   | -202.16960 |
| AIC       | 418.33921  |
| AICc      | 420.41328  |
| SIC       | 433.22915  |
| r squared | 30.23004   |
| SST       | 88.97227   |
| SSE       | 62.07592   |

```
> model.fit(ancestor, indata3$time, seq(0.01,0.06, 0.01), seq(38, 40.5, 0.01), response=
indata3$TLR22, me.response= NULL, fixed.fact=Group_75_MHCII , fixed.cov= NULL, me.fixed.cov=
NULL, mecov.fixed.cov=NULL, random.cov= NULL, me.random.cov=NULL, mecov.random.cov=NULL,
intercept="root", ultrametric=TRUE, support=NULL, convergence=NULL)
```

## BEST ESTIMATES & MODEL FIT – TLR22 group minus 25 + MHCII

### MODEL PARAMETERS

|                                | Estimate   |
|--------------------------------|------------|
| Rate of adaptation             | 23.1049060 |
| Phylogenetic half-life         | 0.0300000  |
| Phylogenetic correction factor | 0.9567191  |
| Stationary variance            | 48.9400000 |

### PRIMARY OPTIMA

UNKNOWN mapped to the root of the tree and includes the coefficient for the ancestral state (Ya)

#### Estimates Std.error

|         |           |          |
|---------|-----------|----------|
| UNKNOWN | 14.917277 | 5.330581 |
| NoNO    | 7.146068  | 2.309934 |
| NoYES   | 4.798604  | 3.160920 |
| YesNO   | 2.993395  | 1.400046 |
| YesYES  | 1.150329  | 2.021938 |

### MODEL FIT

|           | Value      |
|-----------|------------|
| Support   | -207.99899 |
| AIC       | 429.99798  |
| AICc      | 432.07206  |
| SIC       | 444.88793  |
| r squared | 15.79543   |
| SST       | 73.62846   |
| SSE       | 61.99852   |

```
> model.fit(ancestor, indata3$time, seq(0.01,0.05, 0.01), seq(44, 50, 0.01), response=
indata3$TLR22, me.response= NULL, fixed.fact=Group_minus_25_MHCII , fixed.cov= NULL,
me.fixed.cov= NULL, mecov.fixed.cov=NULL, random.cov= NULL, me.random.cov=NULL,
mecov.random.cov=NULL, intercept="root", ultrametric=TRUE, support=NULL, convergence=NULL)
```

## BEST ESTIMATES & MODEL FIT – TLR22 group minus 50 + MHCII

### MODEL PARAMETERS

|                                | Estimate   |
|--------------------------------|------------|
| Rate of adaptation             | 23.1049060 |
| Phylogenetic half-life         | 0.0300000  |
| Phylogenetic correction factor | 0.9567191  |
| Stationary variance            | 49.0300000 |

### PRIMARY OPTIMA

UNKNOWN mapped to the root of the tree and includes the coefficient for the ancestral state (Ya)

#### Estimates Std.error

|         |           |          |
|---------|-----------|----------|
| UNKNOWN | 14.916259 | 5.298721 |
| NoNO    | 6.992132  | 2.040317 |
| NoYES   | 2.361683  | 5.013570 |
| YesNO   | 2.506920  | 1.219826 |
| YesYES  | 1.480402  | 3.506411 |

### MODEL FIT

|           | Value      |
|-----------|------------|
| Support   | -208.05874 |
| AIC       | 430.11749  |
| AICc      | 432.19156  |
| SIC       | 445.00743  |
| r squared | 15.63298   |
| SST       | 73.49330   |
| SSE       | 62.00411   |

```
> model.fit(ancestor, indata3$time, seq(0.01,0.05, 0.01), seq(44, 50, 0.01), response=
indata3$TLR22, me.response= NULL, fixed.fact=Group_minus_50_MHCII , fixed.cov= NULL,
me.fixed.cov= NULL, mecov.fixed.cov=NULL, random.cov= NULL, me.random.cov=NULL,
mecov.random.cov=NULL, intercept="root", ultrametric=TRUE, support=NULL, convergence=NULL)
```

## BEST ESTIMATES & MODEL FIT - TLR25 phylogeny

### MODEL PARAMETERS

|                                | Estimate   |
|--------------------------------|------------|
| Rate of adaptation             | 11.7482573 |
| Phylogenetic half-life         | 0.0590000  |
| Phylogenetic correction factor | 0.9148817  |
| Stationary variance            | 2.7000000  |

### PRIMARY OPTIMA

|              | Estimate | Std.error |
|--------------|----------|-----------|
| Theta_global | 1.021704 | 0.2229397 |

### MODEL FIT

|           | Value     |
|-----------|-----------|
| Support   | -117.4721 |
| AIC       | 240.9441  |
| AICc      | 241.3579  |
| SIC       | 247.3255  |
| r squared | 0.0000    |
| SST       | 62.6399   |
| SSE       | 62.6399   |

```
> model.fit(ancestor, indata3$time, seq(0.00,0.15, 0.001), seq(1, 10, 0.1), response= indata3$TLR25,  
me.response= NULL, fixed.fact=NULL, fixed.cov= NULL, me.fixed.cov= NULL, mecov.fixed.cov=NULL,  
random.cov= NULL, me.random.cov=NULL, mecov.random.cov=NULL, intercept="root",  
ultrametric=TRUE, support=NULL, convergence=NULL)
```

## BEST ESTIMATES & MODEL FIT - TLR25 group 0

### MODEL PARAMETERS

|                                | Estimate   |
|--------------------------------|------------|
| Rate of adaptation             | 17.3286795 |
| Phylogenetic half-life         | 0.0400000  |
| Phylogenetic correction factor | 0.9422922  |
| Stationary variance            | 2.1500000  |

### PRIMARY OPTIMA

UNKNOWN mapped to the root of the tree and includes the coefficient for the ancestral state (Ya)

#### Estimates Std.error

UNKNOWN 4.8602440 1.0083787

NO 1.0701899 0.3241538

YES 0.5886049 0.2752620

### MODEL FIT

#### Value

Support -110.74512

AIC 231.49023

AICc 232.56166

SIC 242.12590

r squared 21.83949

SST 79.25891

SSE 61.94917

```
> model.fit(ancestor, indata2$time, seq(0.01,0.08, 0.01), seq(1.8, 3, 0.01), response= indata2$TLR25,
me.response= NULL, fixed.fact=Group_0, fixed.cov= NULL, me.fixed.cov= NULL,
mecov.fixed.cov=NULL, random.cov= NULL, me.random.cov=NULL, mecov.random.cov=NULL,
intercept="root", ultrametric=TRUE, support=NULL, convergence=NULL)
```



## BEST ESTIMATES & MODEL FIT - TLR25 group 25

### MODEL PARAMETERS

|                                | Estimate   |
|--------------------------------|------------|
| Rate of adaptation             | 17.3286795 |
| Phylogenetic half-life         | 0.0400000  |
| Phylogenetic correction factor | 0.9422922  |
| Stationary variance            | 2.1700000  |

### PRIMARY OPTIMA

UNKNOWN mapped to the root of the tree and includes the coefficient for the ancestral state (Ya)

#### Estimates Std.error

UNKNOWN 4.9454882 1.0085298

NO 1.0286538 0.3876642

YES 0.6932093 0.2495884

### MODEL FIT

#### Value

Support -111.12050

AIC 232.24099

AICc 233.31242

SIC 242.87666

r squared 20.88742

SST 78.52841

SSE 62.12585

```
> model.fit(ancestor, indata2$time, seq(0.01,0.08, 0.01), seq(1.8, 3, 0.01), response= indata2$TLR25,
me.response= NULL, fixed.fact=Group_25, fixed.cov= NULL, me.fixed.cov= NULL,
mecov.fixed.cov=NULL, random.cov= NULL, me.random.cov=NULL, mecov.random.cov=NULL,
intercept="root", ultrametric=TRUE, support=NULL, convergence=NULL)
```

## BEST ESTIMATES & MODEL FIT - TLR25 group 50

### MODEL PARAMETERS

|                                | Estimate   |
|--------------------------------|------------|
| Rate of adaptation             | 17.3286795 |
| Phylogenetic half-life         | 0.0400000  |
| Phylogenetic correction factor | 0.9422922  |
| Stationary variance            | 2.1400000  |

### PRIMARY OPTIMA

UNKNOWN mapped to the root of the tree and includes the coefficient for the ancestral state (Ya)

#### Estimates Std.error

UNKNOWN 4.9596281 0.9967631

NO 0.5510381 0.2915656

YES 1.0380182 0.2971563

### MODEL FIT

#### Value

Support -110.69630

AIC 231.39259

AICc 232.46402

SIC 242.02827

r squared 21.96265

SST 79.62928

SSE 62.14057

```
> model.fit(ancestor, indata2$time, seq(0.01,0.08, 0.01), seq(1.8, 3, 0.01), response= indata2$TLR25,
me.response= NULL, fixed.fact=Group_50, fixed.cov= NULL, me.fixed.cov= NULL,
mecov.fixed.cov=NULL, random.cov= NULL, me.random.cov=NULL, mecov.random.cov=NULL,
intercept="root", ultrametric=TRUE, support=NULL, convergence=NULL)
```

## BEST ESTIMATES & MODEL FIT - TLR25 group 75

### MODEL PARAMETERS

|                                | Estimate   |
|--------------------------------|------------|
| Rate of adaptation             | 23.1049060 |
| Phylogenetic half-life         | 0.0300000  |
| Phylogenetic correction factor | 0.9567191  |
| Stationary variance            | 1.9300000  |

### PRIMARY OPTIMA

UNKNOWN mapped to the root of the tree and includes the coefficient for the ancestral state (Ya)

#### Estimates Std.error

UNKNOWN 5.2370077 1.0103873

NO 0.6168722 0.2122440

YES 2.1608119 0.4634191

### MODEL FIT

#### Value

Support -107.77088

AIC 225.54177

AICc 226.61319

SIC 236.17744

r squared 32.25999

SST 91.51601

SSE 61.99296

```
> model.fit(ancestor, indata2$time, seq(0.01,0.08, 0.01), seq(1.8, 2, 0.01), response= indata2$TLR25,
me.response= NULL, fixed.fact=Group_75, fixed.cov= NULL, me.fixed.cov= NULL,
mecov.fixed.cov=NULL, random.cov= NULL, me.random.cov=NULL, mecov.random.cov=NULL,
intercept="root", ultrametric=TRUE, support=NULL, convergence=NULL)
```

## BEST ESTIMATES & MODEL FIT - TLR25 group minus 25

### MODEL PARAMETERS

|                                | Estimate   |
|--------------------------------|------------|
| Rate of adaptation             | 17.3286795 |
| Phylogenetic half-life         | 0.0400000  |
| Phylogenetic correction factor | 0.9422922  |
| Stationary variance            | 2.1800000  |

### PRIMARY OPTIMA

UNKNOWN mapped to the root of the tree and includes the coefficient for the ancestral state (Ya)

#### Estimates Std.error

UNKNOWN 4.9748519 1.0074679

NO 0.8926867 0.2601707

YES 0.5871671 0.3633712

### MODEL FIT

#### Value

Support -111.15389

AIC 232.30778

AICc 233.37921

SIC 242.94345

r squared 20.80208

SST 78.16819

SSE 61.90758

```
> model.fit(ancestor, indata2$time, seq(0.01,0.08, 0.01), seq(1.8, 3, 0.01), response= indata2$TLR25,
me.response= NULL, fixed.fact=Group_minus_25, fixed.cov= NULL, me.fixed.cov= NULL,
mecov.fixed.cov=NULL, random.cov= NULL, me.random.cov=NULL, mecov.random.cov=NULL,
intercept="root", ultrametric=TRUE, support=NULL, convergence=NULL)
```

## BEST ESTIMATES & MODEL FIT - TLR25 group minus 50

### MODEL PARAMETERS

|                                | Estimate   |
|--------------------------------|------------|
| Rate of adaptation             | 17.3286795 |
| Phylogenetic half-life         | 0.0400000  |
| Phylogenetic correction factor | 0.9422922  |
| Stationary variance            | 2.1800000  |

### PRIMARY OPTIMA

UNKNOWN mapped to the root of the tree and includes the coefficient for the ancestral state (Ya)

#### Estimates Std.error

UNKNOWN 5.0003525 1.0053592

NO 0.8387468 0.2265925

YES 0.4277453 0.6122499

### MODEL FIT

#### Value

Support -111.19170

AIC 232.38339

AICc 233.45482

SIC 243.01907

r squared 20.70535

SST 78.16819

SSE 61.98319

```
> model.fit(ancestor, indata2$time, seq(0.01,0.08, 0.01), seq(1.8, 3, 0.01), response= indata2$TLR25,
me.response= NULL, fixed.fact=Group_minus_50, fixed.cov= NULL, me.fixed.cov= NULL,
mecov.fixed.cov=NULL, random.cov= NULL, me.random.cov=NULL, mecov.random.cov=NULL,
intercept="root", ultrametric=TRUE, support=NULL, convergence=NULL)
```

## BEST ESTIMATES & MODEL FIT - TLR25 + MHCII

### MODEL PARAMETERS

|                                | Estimate   |
|--------------------------------|------------|
| Rate of adaptation             | 23.1049060 |
| Phylogenetic half-life         | 0.0300000  |
| Phylogenetic correction factor | 0.9567191  |
| Stationary variance            | 2.0800000  |

### PRIMARY OPTIMA

UNKNOWN mapped to the root of the tree and includes the coefficient for the ancestral state (Ya)

#### Estimates Std.error

UNKNOWN 4.990496 1.0837721

No 1.555048 0.3898697

Yes 0.618451 0.2372971

### MODEL FIT

#### Value

Support -110.11597

AIC 230.23194

AICc 231.30337

SIC 240.86761

r squared 26.93680

SST 84.91630

SSE 62.04256

```
> model.fit(ancestor, indata3$time, seq(0.01,0.08, 0.01), seq(1.8, 3, 0.01), response=
indata3$TLR25, me.response= NULL, fixed.fact=indata3$MHCII, fixed.cov= NULL, me.fixed.cov= NULL,
mecov.fixed.cov=NULL, random.cov= NULL, me.random.cov=NULL, mecov.random.cov=NULL,
intercept="root", ultrametric=TRUE, support=NULL, convergence=NULL)
```

## BEST ESTIMATES & MODEL FIT - TLR25 group 0 + MHCII

### MODEL PARAMETERS

|                                | Estimate   |
|--------------------------------|------------|
| Rate of adaptation             | 23.1049060 |
| Phylogenetic half-life         | 0.0300000  |
| Phylogenetic correction factor | 0.9567191  |
| Stationary variance            | 1.9900000  |

### PRIMARY OPTIMA

UNKNOWN mapped to the root of the tree and includes the coefficient for the ancestral state (Ya)

#### Estimates Std.error

|         |           |           |
|---------|-----------|-----------|
| UNKNOWN | 4.6643980 | 1.0789381 |
| NoNO    | 2.0683599 | 0.4952840 |
| NoYES   | 0.8537901 | 0.5760254 |
| YesNO   | 0.7121886 | 0.3772530 |
| YesYES  | 0.5617877 | 0.2944273 |

### MODEL FIT

|           | Value      |
|-----------|------------|
| Support   | -108.77914 |
| AIC       | 231.55828  |
| AICc      | 233.63235  |
| SIC       | 246.44822  |
| r squared | 30.02067   |
| SST       | 88.75673   |
| SSE       | 62.11137   |

```
> model.fit(ancestor, indata3$time, seq(0.01,0.08, 0.01), seq(1.3, 2.8, 0.01),  
response= indata3$TLR25, me.response= NULL, fixed.fact=Group_0_MHCII , fixed.cov= NULL,  
me.fixed.cov= NULL, mecov.fixed.cov=NULL, random.cov= NULL, me.random.cov=NULL,  
mecov.random.cov=NULL, intercept="root", ultrametric=TRUE, support=NULL, convergence=NULL)
```

## BEST ESTIMATES & MODEL FIT - TLR25 group 25 + MHCII

### MODEL PARAMETERS

|                                | Estimate   |
|--------------------------------|------------|
| Rate of adaptation             | 23.1049060 |
| Phylogenetic half-life         | 0.0300000  |
| Phylogenetic correction factor | 0.9567191  |
| Stationary variance            | 2.0300000  |

### PRIMARY OPTIMA

UNKNOWN mapped to the root of the tree and includes the coefficient for the ancestral state (Ya)

#### Estimates Std.error

UNKNOWN 4.9060143 1.0730073

NoNO 1.9682961 0.5173944

NoYES 1.1023082 0.5399630

YesNO 0.4951979 0.5043291

YesYES 0.6525104 0.2647694

### MODEL FIT

#### Value

Support -109.37207

AIC 232.74414

AICc 234.81822

SIC 247.63408

r squared 28.66923

SST 87.00783

SSE 62.06336

```
> model.fit(ancestor, indata3$time, seq(0.01,0.08, 0.01), seq(1.3, 2.8, 0.01),  
response= indata3$TLR25, me.response= NULL, fixed.fact=Group_25_MHCII , fixed.cov= NULL,  
me.fixed.cov= NULL, mecov.fixed.cov=NULL, random.cov= NULL, me.random.cov=NULL,  
mecov.random.cov=NULL, intercept="root", ultrametric=TRUE, support=NULL, convergence=NULL)
```



## BEST ESTIMATES & MODEL FIT - TLR25 group 50 + MHCII

### MODEL PARAMETERS

|                                | Estimate   |
|--------------------------------|------------|
| Rate of adaptation             | 23.1049060 |
| Phylogenetic half-life         | 0.0300000  |
| Phylogenetic correction factor | 0.9567191  |
| Stationary variance            | 2.0600000  |

### PRIMARY OPTIMA

UNKNOWN mapped to the root of the tree and includes the coefficient for the ancestral state (Ya)

#### Estimates Std.error

UNKNOWN 5.0484793 1.0835715

NoNO 1.2000166 0.7353938

NoYES 1.6665774 0.4346457

YesNO 0.4979530 0.3061494

YesYES 0.7953611 0.3710797

### MODEL FIT

#### Value

Support -109.76484

AIC 233.52968

AICc 235.60376

SIC 248.41962

r squared 27.75972

SST 85.74073

SSE 61.93935

```
> model.fit(ancestor, indata3$time, seq(0.01,0.08, 0.01), seq(1, 2.5, 0.01), response=
indata3$TLR25, me.response= NULL, fixed.fact=Group_50_MHCII , fixed.cov= NULL, me.fixed.cov=
NULL, mecov.fixed.cov=NULL, random.cov= NULL, me.random.cov=NULL, mecov.random.cov=NULL,
intercept="root", ultrametric=TRUE, support=NULL, convergence=NULL)
```

## BEST ESTIMATES & MODEL FIT - TLR25 group 75 + MHCII

### MODEL PARAMETERS

|                                | Estimate   |
|--------------------------------|------------|
| Rate of adaptation             | 23.1049060 |
| Phylogenetic half-life         | 0.0300000  |
| Phylogenetic correction factor | 0.9567191  |
| Stationary variance            | 1.8500000  |

### PRIMARY OPTIMA

UNKNOWN mapped to the root of the tree and includes the coefficient for the ancestral state (Ya)

#### Estimates Std.error

UNKNOWN 4.8155471 1.0246259

NoNO 1.0017827 0.4324982

NoYES 2.7388718 0.6104231

YesNO 0.5119824 0.2369661

YesYES 1.4982955 0.6806854

### MODEL FIT

#### Value

Support -106.45249

AIC 226.90499

AICc 228.97906

SIC 241.79493

r squared 35.08048

SST 95.47346

SSE 61.98091

```
> model.fit(ancestor, indata3$time, seq(0.01,0.08, 0.01), seq(1, 4, 0.01), response=
indata3$TLR25, me.response= NULL, fixed.fact=Group_75_MHCII , fixed.cov= NULL, me.fixed.cov=
NULL, mecov.fixed.cov=NULL, random.cov= NULL, me.random.cov=NULL, mecov.random.cov=NULL,
intercept="root", ultrametric=TRUE, support=NULL, convergence=NULL)
```

## BEST ESTIMATES & MODEL FIT - TLR25 group minus 25 + MHCII

### MODEL PARAMETERS

|                                | Estimate   |
|--------------------------------|------------|
| Rate of adaptation             | 23.1049060 |
| Phylogenetic half-life         | 0.0300000  |
| Phylogenetic correction factor | 0.9567191  |
| Stationary variance            | 2.0300000  |

### PRIMARY OPTIMA

UNKNOWN mapped to the root of the tree and includes the coefficient for the ancestral state (Ya)

#### Estimates Std.error

UNKNOWN 4.7821822 1.0856518

NoNO 1.8687699 0.4704524

NoYES 0.9558465 0.6437682

YesNO 0.6776808 0.2851401

YesYES 0.4954454 0.4117977

### MODEL FIT

#### Value

Support -109.38494

AIC 232.76988

AICc 234.84396

SIC 247.65983

r squared 28.63965

SST 87.00783

SSE 62.08910

```
> model.fit(ancestor, indata3$time, seq(0.01,0.08, 0.01), seq(1.3, 2.8, 0.01),  
response= indata3$TLR25, me.response= NULL, fixed.fact=Group_minus_25_MHCII, fixed.cov= NULL,  
me.fixed.cov= NULL, mecov.fixed.cov=NULL, random.cov= NULL, me.random.cov=NULL,  
mecov.random.cov=NULL, intercept="root", ultrametric=TRUE, support=NULL, convergence=NULL)
```

## BEST ESTIMATES & MODEL FIT – TLR25 group minus 50 + MHCII

### MODEL PARAMETERS

|                                | Estimate   |
|--------------------------------|------------|
| Rate of adaptation             | 23.1049060 |
| Phylogenetic half-life         | 0.0300000  |
| Phylogenetic correction factor | 0.9567191  |
| Stationary variance            | 2.0600000  |

### PRIMARY OPTIMA

UNKNOWN mapped to the root of the tree and includes the coefficient for the ancestral state (Ya)

#### Estimates Std.error

UNKNOWN 4.9100324 1.0861097

NoNO 1.6539606 0.4182156

NoYES 0.9515187 1.0276607

YesNO 0.6639259 0.2500348

YesYES 0.2433077 0.7187294

### MODEL FIT

#### Value

Support -109.76376

AIC 233.52751

AICc 235.60159

SIC 248.41745

r squared 27.76225

SST 85.74073

SSE 61.93718

```
> model.fit(ancestor, indata3$time, seq(0.01,0.08, 0.01), seq(1.3, 2.8, 0.01),  
response= indata3$TLR25, me.response= NULL, fixed.fact=Group_minus_50_MHCII , fixed.cov= NULL,  
me.fixed.cov= NULL, mecov.fixed.cov=NULL, random.cov= NULL, me.random.cov=NULL,  
mecov.random.cov=NULL, intercept="root", ultrametric=TRUE, support=NULL, convergence=NULL)
```

## BEST ESTIMATES & MODEL FIT - TLR9 phylogenetic effect

### MODEL PARAMETERS

|                                | Estimate  |
|--------------------------------|-----------|
| Rate of adaptation             | 5.7762265 |
| Phylogenetic half-life         | 0.1200000 |
| Phylogenetic correction factor | 0.6305712 |
| Stationary variance            | 6.3700000 |

### PRIMARY OPTIMA

|              | Estimate | Std.error |
|--------------|----------|-----------|
| Theta_global | 2.324661 | 0.7098559 |

### MODEL FIT

|           | Value         |
|-----------|---------------|
| Support   | -1.183494e+02 |
| AIC       | 2.426988e+02  |
| AICc      | 2.430988e+02  |
| SIC       | 2.491755e+02  |
| r squared | -2.221451e-14 |
| SST       | 6.397104e+01  |
| SSE       | 6.397104e+01  |

model.fit(ancestor, time, seq(0,0.5, 0.01), seq(5, 10, 0.01), response= TLR9, me.response= NULL, fixed.fact=NULL, fixed.cov= NULL, me.fixed.cov= NULL, mecov.fixed.cov=NULL, random.cov= NULL, me.random.cov=NULL, mecov.random.cov=NULL, intercept="root", ultrametric=TRUE, support=NULL, convergence=NULL)

## BEST ESTIMATES & MODEL FIT – TLR9 maximum depth

### MODEL PARAMETERS

#### Estimate

Rate of adaptation 4.3321699  
Phylogenetic half-life 0.1600000  
Phylogenetic correction factor 0.5517876  
Stationary variance 6.1900000

#### Maxdepth

Predictor theta 7.176028e+02  
Predictor variance 2.127460e+07

### PRIMARY OPTIMA

#### Evolutionary regression

##### Estimate Std. Error

Intercept 2.55726 0.76584  
Maxdepth -0.00052 0.00020

#### Optimal regression

##### Estimate Std. Error

K 2.40257 0.75533  
Maxdepth -0.00093 0.00036

#### Bias-corr. regression parameters

K 2.5572620431  
Maxdepth -0.0005178823

Decomposition of K assuming  $Y_a = X_a$  to get the optimal regression intercept  $B_0$

[1] 2.70278

(Use this as the intercept when plotting the regression line)

### MODEL FIT

Support -114.709044

AIC 237.418088

AICc 238.096054

SIC 246.053621

r squared 9.512911

SST 72.640560

SSE 65.730328

model.fit(ancestor, time, seq(0.05,0.3, 0.01), seq(6.1, 6.3, 0.01), response= TLR9, me.response= NULL, fixed.fact=NULL, fixed.cov= NULL, me.fixed.cov= NULL, mecov.fixed.cov=NULL, random.cov= Maxdepth, me.random.cov=NULL, mecov.random.cov=NULL, intercept="root", ultrametric=TRUE, support=NULL, convergence=NULL)

## BEST ESTIMATES & MODEL FIT - TLR22 phylogenetic effect

### MODEL PARAMETERS

|                                | Estimate   |
|--------------------------------|------------|
| Rate of adaptation             | 17.3286795 |
| Phylogenetic half-life         | 0.0400000  |
| Phylogenetic correction factor | 0.8526366  |
| Stationary variance            | 70.6000000 |

### PRIMARY OPTIMA

|              | Estimate | Std.error |
|--------------|----------|-----------|
| Theta_global | 4.499373 | 1.638639  |

### MODEL FIT

|           | Value      |
|-----------|------------|
| Support   | -214.89433 |
| AIC       | 435.78867  |
| AICc      | 436.18867  |
| SIC       | 442.26532  |
| r squared | 0.00000    |
| SST       | 64.02347   |
| SSE       | 64.02347   |

model.fit(ancestor, time, seq(0,0.1, 0.01), seq(60, 100, 0.1), response=TLR22, me.response=NULL, fixed.fact=NULL, fixed.cov=NULL, me.fixed.cov=NULL, mecov.fixed.cov=NULL, random.cov=NULL, me.random.cov=NULL, mecov.random.cov=NULL, intercept="root", ultrametric=TRUE, support=NULL, convergence=NULL)



## BEST ESTIMATES & MODEL FIT – TLR22 maximum depth

### MODEL PARAMETERS

#### Estimate

Rate of adaptation 13.8629436  
Phylogenetic half-life 0.0500000  
Phylogenetic correction factor 0.8200624  
Stationary variance 72.1100000

#### Maxdepth

Predictor theta 7.176028e+02  
Predictor variance 2.127460e+07

### PRIMARY OPTIMA

#### Evolutionary regression

##### Estimate Std. Error

Intercept 2.89181 2.06756  
Maxdepth 0.00176 0.00100

#### Optimal regression

##### Estimate Std. Error

K 2.96982 2.04058  
Maxdepth 0.00217 0.00122

#### Bias-corr. regression parameters

K 2.891805411  
Maxdepth 0.001762484

Decomposition of K assuming  $Y_a = X_a$  to get the optimal regression intercept  $B_0$

[1] 2.689926

(Use this as the intercept when plotting the regression line)

### MODEL FIT

#### Value

Support -213.507480

AIC 435.014959  
AICc 435.692926  
SIC 443.650492  
r squared 4.743322  
SST 67.049714  
SSE 63.869330

model.fit(ancestor, time, seq(0.03,0.06, 0.01), seq(72, 73, 0.01), response= TLR22, me.response= NULL, fixed.fact=NULL, fixed.cov= NULL, me.fixed.cov= NULL, mecov.fixed.cov=NULL, random.cov= Maxdepth, me.random.cov=NULL, mecov.random.cov=NULL, intercept="root", ultrametric=TRUE, support=NULL, convergence=NULL)

### Supplementary table 3 Diversifying selection analyses - results from MEME (mixed effects model of evolution)

TLR3

Selection model

|   |    |    |    |
|---|----|----|----|
| * | AC | 1  | AT |
| - | *  | AC | 1  |
| - | -  | *  | AT |
| - | -  | -  | *  |

MEME results significance level 0.05

| Codon | a      | $\beta^-$ | $\Pr[\beta=\beta^-]$ | $\beta^+$ | $\Pr[\beta=\beta^+]$ | p-value | q-value |
|-------|--------|-----------|----------------------|-----------|----------------------|---------|---------|
| 11    | 0.3127 | 0.1638    | 0.7918               | 5.9282    | 0.2082               | 0.0190  | 1       |
| 14    | 0      | 0         | 0.8081               | 14.4583   | 0.1919               | 0.0061  | 0.7157  |
| 23    | 0.6057 | 0.3156    | 0.9597               | 65.4143   | 0.0403               | 0.0393  | 1       |
| 28    | 0.2113 | 0         | 0.7628               | 1.8349    | 0.2372               | 0.0332  | 1       |
| 31    | 0.5751 | 0.0995    | 0.7785               | 5.3002    | 0.2215               | 0.0222  | 1       |
| 40    | 0.5945 | 0         | 0.7064               | 3.8732    | 0.2936               | 0.0403  | 1       |
| 75    | 0.6945 | 0.0492    | 0.7472               | 8.6920    | 0.2528               | 0.0024  | 0.3717  |
| 84    | 0      | 0         | 0.8840               | 4.2079    | 0.1160               | 0.0278  | 1       |
| 97    | 0.2739 | 0         | 0.7741               | 3.1438    | 0.2259               | 0.0461  | 1       |
| 107   | 0.3551 | 0.0407    | 0.8448               | 9.0952    | 0.1552               | 0.0124  | 0.9796  |
| 145   | 0.1071 | 0.0489    | 0.9038               | 21.9453   | 0.0962               | 0.0002  | 0.1091  |
| 162   | 0.2529 | 0.1645    | 0.6936               | 9.3461    | 0.3064               | 0.0270  | 1       |
| 166   | 0.3948 | 0         | 0.8522               | 45.9382   | 0.1478               | 0.0296  | 1       |
| 241   | 0.8265 | 0         | 0.9437               | 3728.7500 | 0.0563               | 0.0193  | 1       |
| 250   | 0      | 0         | 0.8077               | 2.3165    | 0.1923               | 0.0397  | 1       |
| 339   | 0.8311 | 0.3103    | 0.9587               | 610.8070  | 0.0413               | 0.0393  | 1       |
| 394   | 0      | 0         | 0.3060               | 2.1701    | 0.6940               | 0.0023  | 0.5341  |
| 413   | 0      | 0         | 0.7623               | 8.2909    | 0.2377               | 0.0083  | 0.7863  |
| 414   | 0.2407 | 0.0924    | 0.9640               | 3333.1100 | 0.0360               | 0.0176  | 1       |

TLR9 1

Selection model

|   |    |    |    |
|---|----|----|----|
| * | AC | 1  | AT |
| - | *  | AC | CT |
| - | -  | *  | AT |
| - | -  | -  | *  |

MEME results significance level 0.05

| Codon | a      | $\beta^-$ | $\Pr[\beta=\beta^-]$ | $\beta^+$ | $\Pr[\beta=\beta^+]$ | p-value | q-value |
|-------|--------|-----------|----------------------|-----------|----------------------|---------|---------|
| 4     | 0      | 0         | 0.5120               | 5.8732    | 0.4880               | 0.0095  | 0.4929  |
| 8     | 0.1018 | 0         | 0.3788               | 1.6997    | 0.6212               | 0.0137  | 0.4764  |
| 103   | 0.1744 | 0.1744    | 0.8010               | 102.6540  | 0.1990               | 0       | 0.0004  |
| 127   | 0.9911 | 0.5416    | 0.8643               | 18.6733   | 0.1357               | 0.0443  | 1       |
| 143   | 0.4189 | 0         | 0.9092               | 10.6899   | 0.0908               | 0.0099  | 0.4398  |
| 154   | 0.1298 | 0.1298    | 0                    | 2.0668    | 1                    | 0.0308  | 0.8002  |
| 172   | 0.4630 | 0         | 0.9787               | 110.3240  | 0.0213               | 0.0223  | 0.6317  |
| 198   | 0      | 0         | 0.9248               | 29.8538   | 0.0752               | 0       | 0.0004  |
| 229   | 1.6669 | 0.3283    | 0.8809               | 37.5264   | 0.1191               | 0.0133  | 0.5172  |
| 230   | 0.5929 | 0.1874    | 0.8734               | 20.4878   | 0.1266               | 0.0011  | 0.1116  |
| 233   | 1.0481 | 0.2233    | 0.8062               | 12.3231   | 0.1938               | 0.0080  | 0.4991  |
| 239   | 0.7056 | 0         | 0.8957               | 19.4503   | 0.1043               | 0.0045  | 0.3518  |
| 311   | 0.5993 | 0.5667    | 0.9270               | 38.9681   | 0.0730               | 0.0168  | 0.5227  |

**TLR9 2** Selection model

|   |    |    |    |
|---|----|----|----|
| * | AC | 1  | AT |
| - | *  | AC | 1  |
| - | -  | *  | AT |
| - | -  | -  | *  |

MEME results significance level 0.05

| Codon | a      | $\beta^-$ | $\text{Pr}[\beta=\beta^-]$ | $\beta^+$  | $\text{Pr}[\beta=\beta^+]$ | p-value | q-value |
|-------|--------|-----------|----------------------------|------------|----------------------------|---------|---------|
| 2     | 0      | 0         | 0.3209                     | 4.6936     | 0.6791                     | 0.0189  | 0.4587  |
| 17    | 0.6945 | 0.2940    | 0.9768                     | 304.7330   | 0.0232                     | 0.0012  | 0.1025  |
| 89    | 1.4672 | 0         | 0.9587                     | 25.6757    | 0.0413                     | 0.0219  | 0.4636  |
| 92    | 0.0364 | 0.0364    | 0.9812                     | 81.0526    | 0.0188                     | 0.0203  | 0.4593  |
| 96    | 0.6880 | 0         | 0.9607                     | 24.9478    | 0.0393                     | 0.0010  | 0.1087  |
| 127   | 0      | 0         | 0                          | 1.0409     | 1                          | 0.0018  | 0.0994  |
| 137   | 0.3491 | 0         | 0.7918                     | 4.5849     | 0.2082                     | 0.0032  | 0.1193  |
| 149   | 0.0859 | 0         | 0.7482                     | 7.4237     | 0.2518                     | 0.0263  | 0.5242  |
| 150   | 0.2284 | 0.2284    | 0.9255                     | 21.6380    | 0.0745                     | 0.0453  | 0.7314  |
| 173   | 0.7268 | 0         | 0.5647                     | 4.3052     | 0.4353                     | 0.0270  | 0.5078  |
| 177   | 0.5215 | 0.0340    | 0.8707                     | 27.7355    | 0.1293                     | 0.0144  | 0.3749  |
| 179   | 1.2577 | 0.2557    | 0.9752                     | 189.8810   | 0.0248                     | 0.0111  | 0.3418  |
| 181   | 0.2659 | 0.0664    | 0.8804                     | 15.5179    | 0.1196                     | 0.0017  | 0.1152  |
| 198   | 0      | 0         | 0.6072                     | 9.6686     | 0.3928                     | 0.0024  | 0.1139  |
| 206   | 0.5019 | 0         | 0.8494                     | 5.0683     | 0.1506                     | 0.0370  | 0.6279  |
| 218   | 0.2645 | 0         | 0.7688                     | 5.8491     | 0.2312                     | 0.0009  | 0.1477  |
| 242   | 0.1431 | 0         | 0.8267                     | 10.8630    | 0.1733                     | 0.0005  | 0.1734  |
| 266   | 0.2078 | 0.2078    | 0.8620                     | 10.6094    | 0.1380                     | 0.0078  | 0.2635  |
| 268   | 0.6004 | 0.1383    | 0.8141                     | 20.7451    | 0.1859                     | 0.0030  | 0.1292  |
| 270   | 0.4748 | 0.0468    | 0.9506                     | 40057.0000 | 0.0494                     | 0.0121  | 0.3411  |
| 276   | 0.5561 | 0.2925    | 0.8429                     | 13.0299    | 0.1571                     | 0.0312  | 0.5559  |
| 320   | 0.7292 | 0.7292    | 0.8764                     | 17.8974    | 0.1236                     | 0.0488  | 0.7517  |

**TLR25 1** Selection model

|   |    |    |    |
|---|----|----|----|
| * | AC | 1  | AC |
| - | *  | AC | 1  |
| - | -  | *  | AC |
| - | -  | -  | *  |

MEME results significance level 0.05

| Codon | a      | $\beta^-$ | $\text{Pr}[\beta=\beta^-]$ | $\beta^+$ | $\text{Pr}[\beta=\beta^+]$ | p-value | q-value |
|-------|--------|-----------|----------------------------|-----------|----------------------------|---------|---------|
| 5     | 0.3218 | 0         | 0.7954                     | 3.4903    | 0.2046                     | 0.0392  | 1       |
| 57    | 0.0621 | 0         | 0.5173                     | 2.8724    | 0.4827                     | 0.0489  | 1       |

**TLR25 2** Selection model

|   |    |   |    |
|---|----|---|----|
| * | AC | 1 | AT |
|---|----|---|----|

|   |   |    |    |
|---|---|----|----|
| - | * | AT | AC |
| - | - | *  | AT |
| - | - | -  | *  |

MEME results significance level 0.05

| Codon | a      | $\beta^-$ | $\Pr[\beta=\beta^-]$ | $\beta^+$ | $\Pr[\beta=\beta^+]$ | p-value | q-value |
|-------|--------|-----------|----------------------|-----------|----------------------|---------|---------|
| 36    | 0      | 0         | 0.1088               | 1.7258    | 0.8912               | 0.0112  | 0.4987  |
| 57    | 0      | 0         | 0                    | 1.4135    | 1                    | 0.0377  | 1       |
| 67    | 2.1751 | 0.2475    | 0.8339               | 45.4946   | 0.1661               | 0.0094  | 0.6245  |
| 79    | 0      | 0         | 0                    | 1.4386    | 1                    | 0.0057  | 0.7617  |

**TLR25 3** Selection model

|   |    |    |    |
|---|----|----|----|
| * | AC | 1  | AT |
| - | *  | AC | CT |
| - | -  | *  | AT |
| - | -  | -  | *  |

MEME results significance level 0.05

| Codon | a      | $\beta^-$ | $\Pr[\beta=\beta^-]$ | $\beta^+$ | $\Pr[\beta=\beta^+]$ | p-value | q-value |
|-------|--------|-----------|----------------------|-----------|----------------------|---------|---------|
| 96    | 0.9550 | 0.4347    | 0.8928               | 30.1618   | 0.1072               | 0.0175  | 0.9273  |
| 114   | 0      | 0         | 0.7961               | 6.6317    | 0.2039               | 0.0036  | 0.3848  |
| 117   | 0      | 0         | 0.6883               | 9.3362    | 0.3117               | 0.0305  | 1       |
| 193   | 0      | 0         | 0.9450               | 29.9778   | 0.0550               | 0       | 0.0073  |
| 195   | 0.7467 | 0.7467    | 0.9034               | 51.5451   | 0.0966               | 0.0123  | 0.8694  |

**TLR25 4** Selection model

|   |    |    |    |
|---|----|----|----|
| * | AC | 1  | AC |
| - | *  | AC | 1  |
| - | -  | *  | AC |
| - | -  | -  | *  |

MEME results significance level 0.05

| Codon | a      | $\beta^-$ | $\Pr[\beta=\beta^-]$ | $\beta^+$ | $\Pr[\beta=\beta^+]$ | p-value | q-value |
|-------|--------|-----------|----------------------|-----------|----------------------|---------|---------|
| 1     | 0.2197 | 0         | 0.8691               | 10.1151   | 0.1309               | 0.0272  | 0.9193  |
| 10    | 0.8679 | 0         | 0.6632               | 17.3242   | 0.3368               | 0.0065  | 0.5455  |
| 16    | 0.5304 | 0.2878    | 0.8765               | 18.6946   | 0.1235               | 0.0020  | 0.3359  |
| 37    | 0.2254 | 0.2254    | 0.7115               | 10.9954   | 0.2885               | 0.0232  | 0.9822  |
| 62    | 0.8570 | 0         | 0.6552               | 5.0907    | 0.3448               | 0.0305  | 0.8587  |
| 71    | 0.3064 | 0         | 0.9683               | 120.9230  | 0.0317               | 0.0087  | 0.4929  |
| 86    | 1.5487 | 0         | 0.9651               | 29.8710   | 0.0349               | 0.0410  | 0.9900  |

A

TLR9 section 1

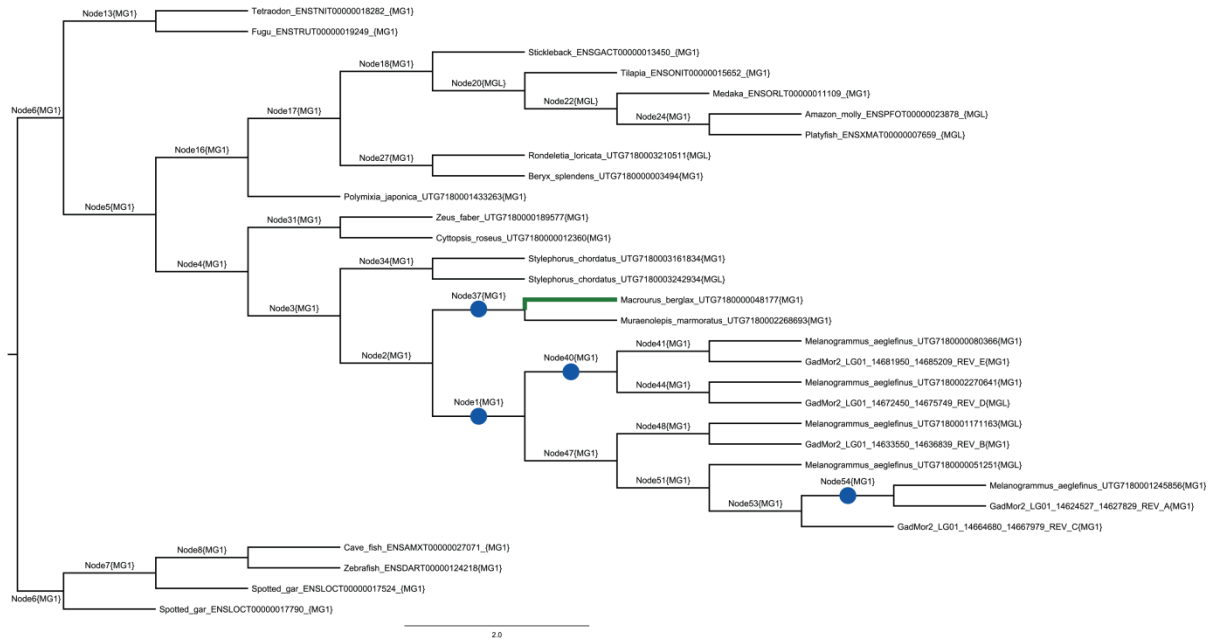

B

TLR9 section 2

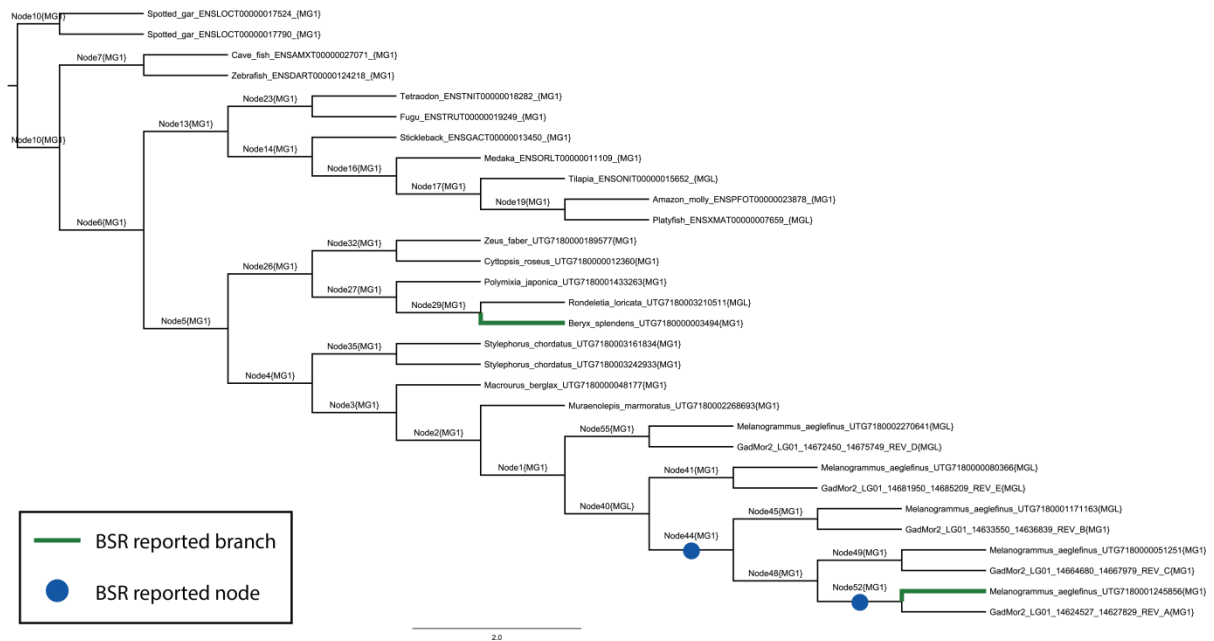

**Supplementary figure 1** Tree derived from the BSR selection analysis where significantly reported nodes and branches likely to have experience diversifying selection are highlighted. There are two trees representing section 1 (A) and section 2 (B) of the overall TLR9 alignments. The trees were rooted on the sequences from Spotted gar and ordered in FigTree. Colors added in Illustrator.

TLR25 section 3

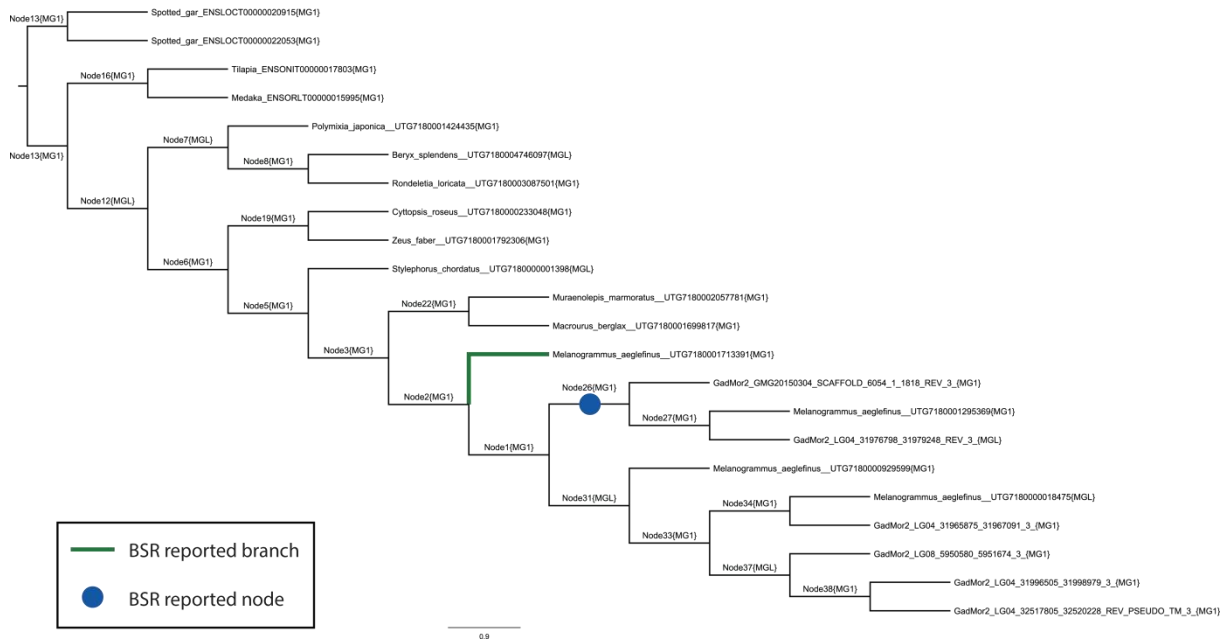

**Supplementary figure 2** Tree derived from the BSR selection analysis where significantly reported nodes and branches likely to have experience diversifying selection are highlighted. The tree represents the BSR analysis performed on section 3 of the overall TLR25 alignment. The tree was rooted on the sequences from Spotted gar and ordered in FigTree. Colors added in Illustrator.
